# Supplementary material for: Complexity of αvβ6-integrin targeting RGD peptide trimers: emergence of non-specific binding by synergistic interaction
Source: Royal Society of Chemistry journal article supplement (doi:10.1039/d3md00365e), 2023-01-01
Supplement: d3md00365e1.pdf [file d3md00365e1.pdf]

Supporting Information

# Complexity of $\alpha\beta6$ -Integrin Targeting RGD Peptide Trimers: Emergence of Non-Specific Binding by Synergistic Interaction

Neil Gerard Quigley, Frauke Richter, Susanne Kossatz, Johannes Notni\*

|                                                                     |           |
|---------------------------------------------------------------------|-----------|
| <b>1. Analytical data for cyclic peptide alkyne building blocks</b> | <b>2</b>  |
| cyclo[FR(Pbf)GD(tBu)LAYp(NMe)K(pentynoic amide)] (FY)               | 2         |
| cyclo[YR(Pbf)GD(tBu)LAFp(NMe)K(pentynoic amide)] (YF)               | 3         |
| <b>2. ESI-MS data for peptide trimers</b>                           | <b>4</b>  |
| <b>3. HPLC Chromatograms of <sup>nat</sup>Ga-complexed trimers</b>  | <b>9</b>  |
| <b>4. Biodistribution data</b>                                      | <b>14</b> |
| <b>5. Kinetic data</b>                                              | <b>19</b> |

# 1. Analytical data for cyclic peptide alkyne building blocks

*cyclo[FR(Pbf)GD(tBu)LAYp(NMe)K(pentynoic amide)] (FY)*

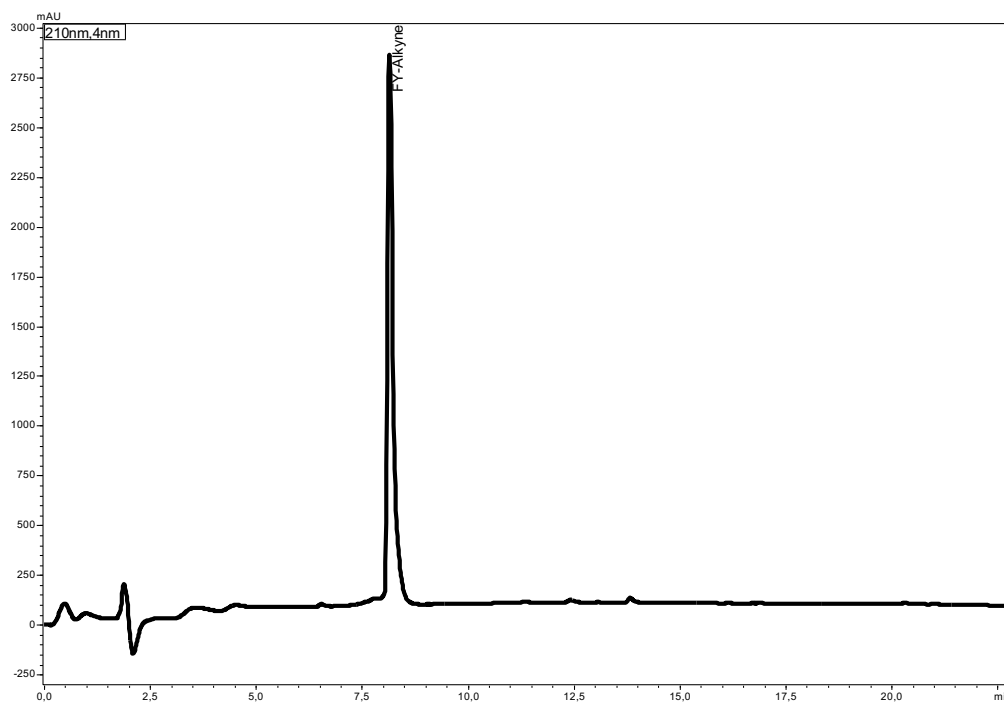

**Figure S1:** Analytical HPLC (UV 210 nm) of **FY**. HPLC analysis was performed using analytical column C1, 0.5 mL/min; gradient: 10–90% MeCN in H<sub>2</sub>O containing 0.1% TFA in 20 min.  $t_R = 8.2$  min.

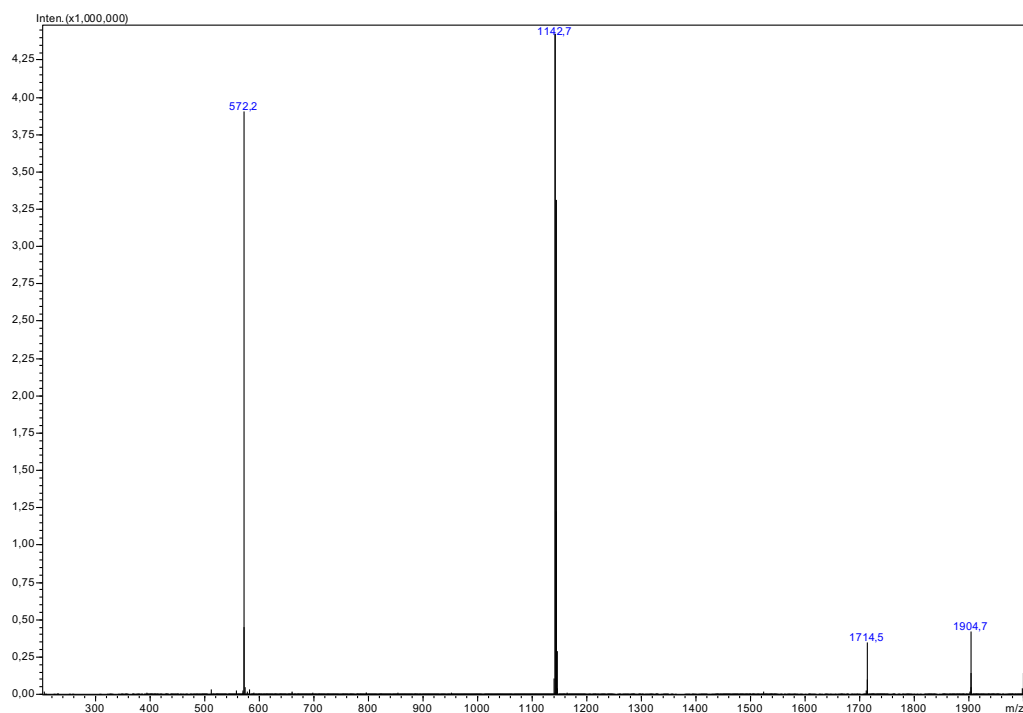

**Figure S2:** ESI-MS (positive mode) of **FY**.  $m/z$  corresponds to molecular composition as follows: 1904.7  $[5M+3H]^{3+}$ , 1714.5  $[3M+2H]^{2+}$ , 1142.7  $[M+H]^+$ , 572.2  $[M+2H]^{2+}$ .

*cyclo*[YR(Pbf)GD(tBu)LAFp(NMe)K(pentynoic amide)] (YF)

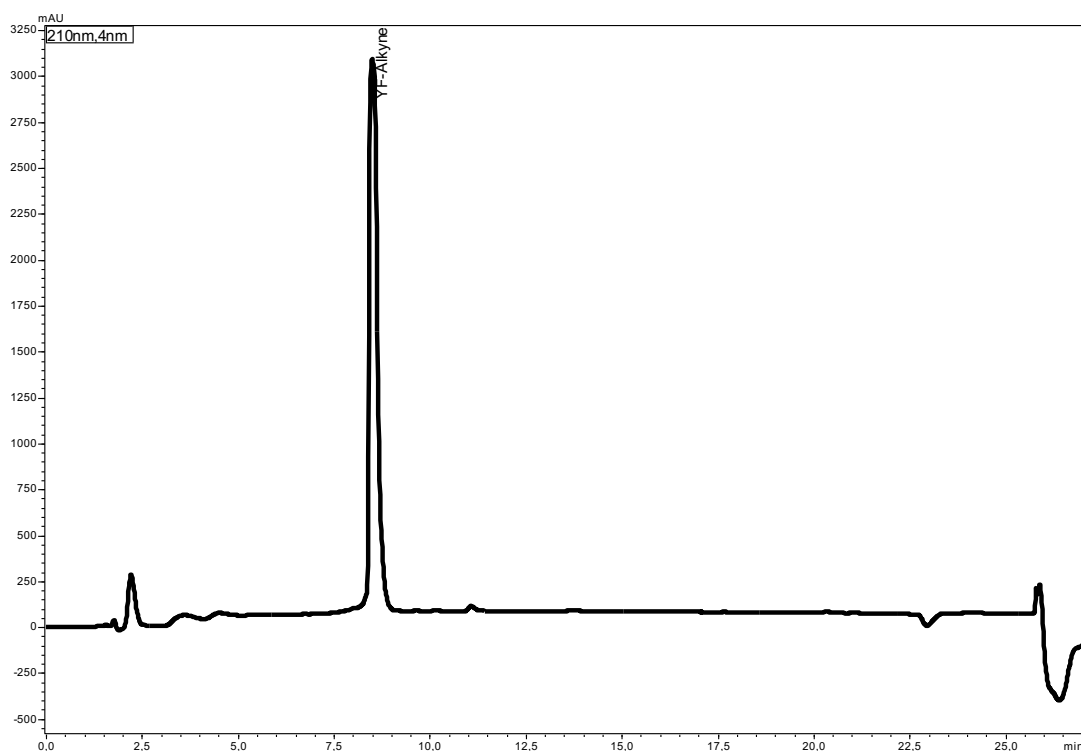

**Figure S3:** Analytical HPLC (UV 210 nm) of YF. HPLC analysis was performed using analytical column C1, 0.5 mL/min; gradient: 10–90% MeCN in H<sub>2</sub>O containing 0.1% TFA in 20 min.  $t_R = 8.2$  min.

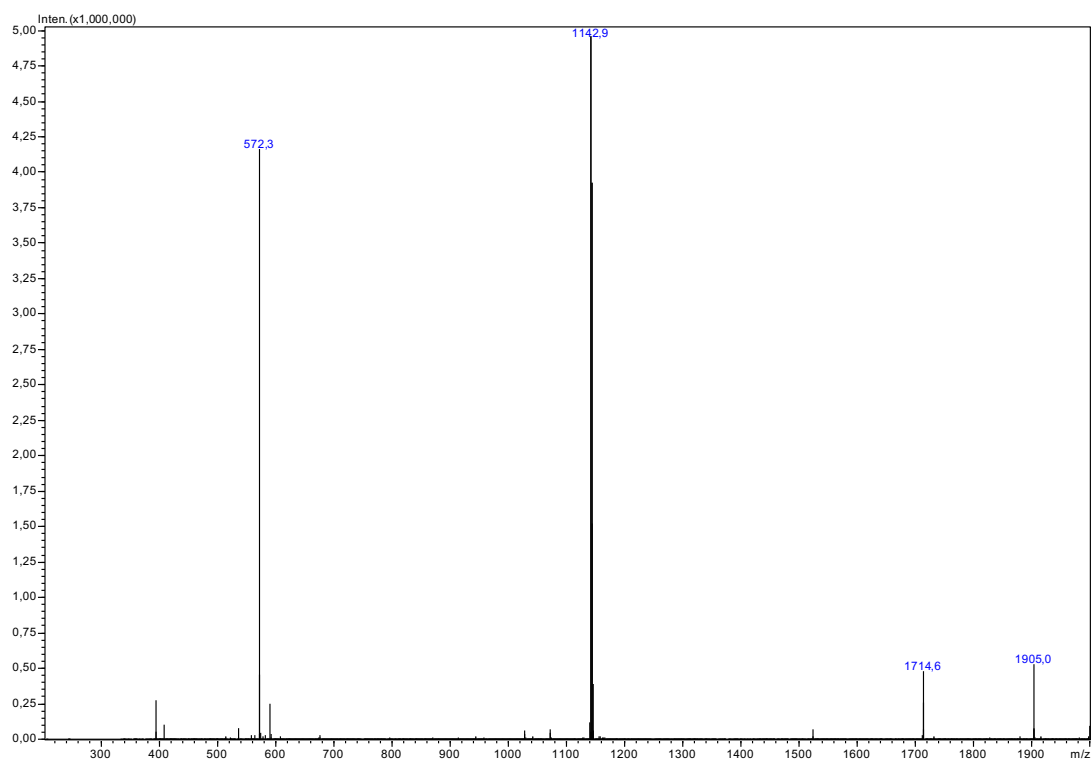

**Figure S4:** ESI-MS (positive mode) of YF. m/z corresponds to molecular composition as follows: 1905 [5M+3H]<sup>3+</sup>, 1714.6 [3M+2H]<sup>2+</sup>, 1142.9 [M+H]<sup>+</sup>, 572.3 [M+2H]<sup>2+</sup>.

## 2. ESI-MS data for peptide trimers

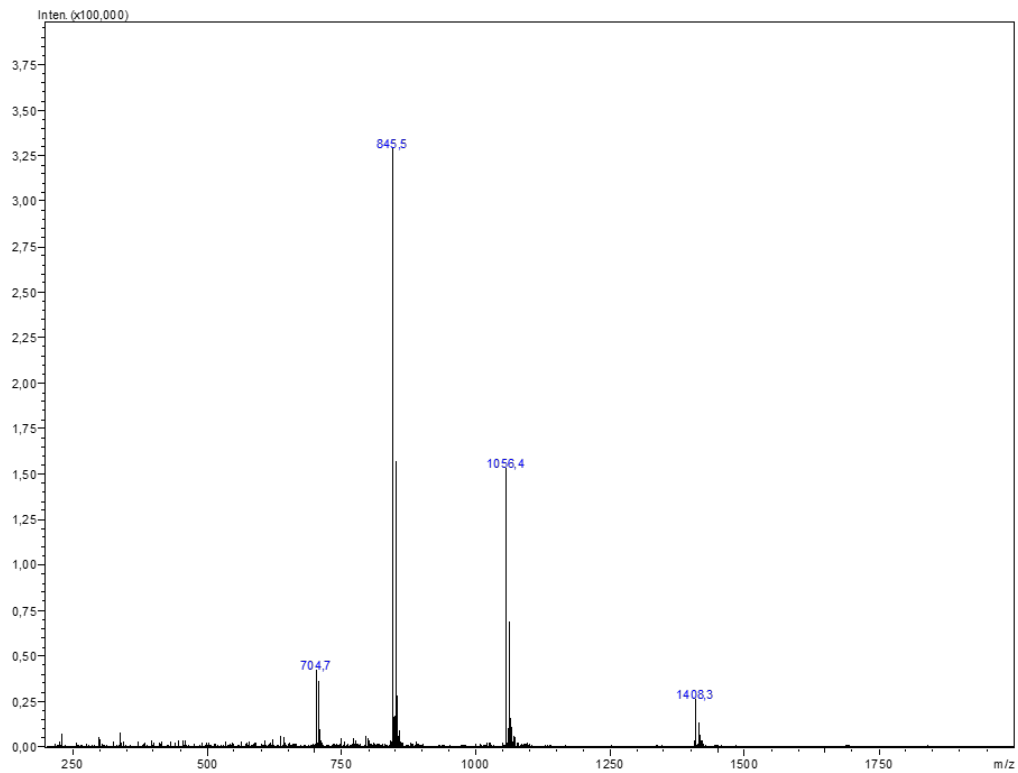

**Figure S5:** ESI-MS (positive mode) of **Y1Y**.  $m/z$  corresponds to molecular composition as follows: 1408.3  $[M+3H]^{3+}$ , 1056.4  $[M+4H]^{4+}$ , 845.5  $[M+5H]^{5+}$ , 704.7  $[M+6H]^{6+}$ .

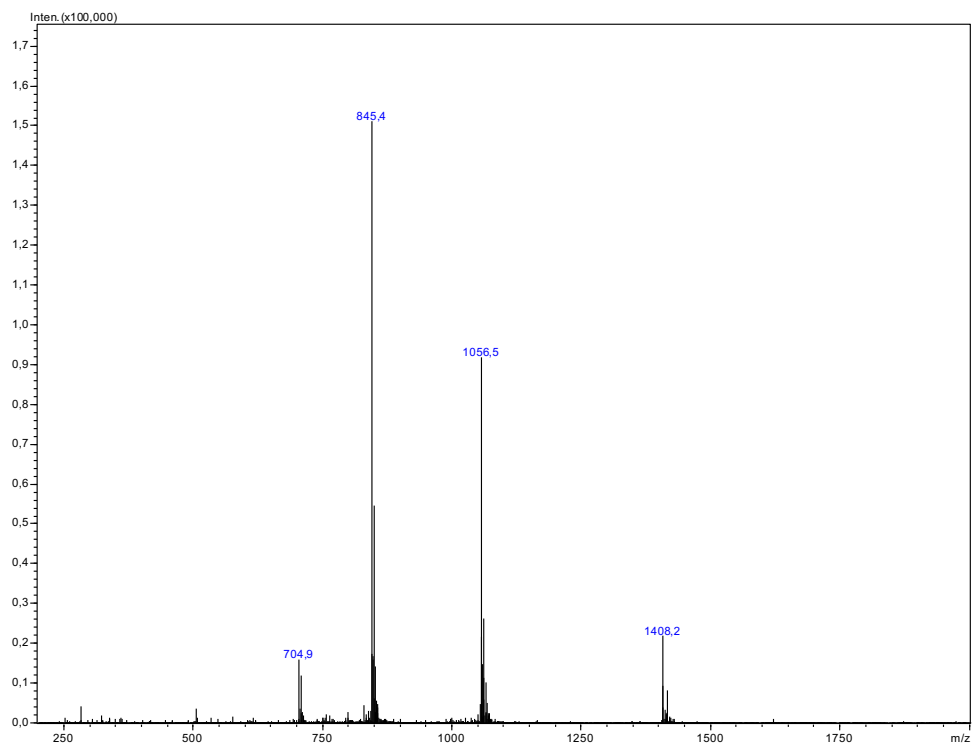

**Figure S6:** ESI-MS (positive mode) of **Y1F**.  $m/z$  corresponds to molecular composition as follows: 1408.2  $[M+3H]^{3+}$ , 1056.5  $[M+4H]^{4+}$ , 845.4  $[M+5H]^{5+}$ , 704.9  $[M+6H]^{6+}$ .

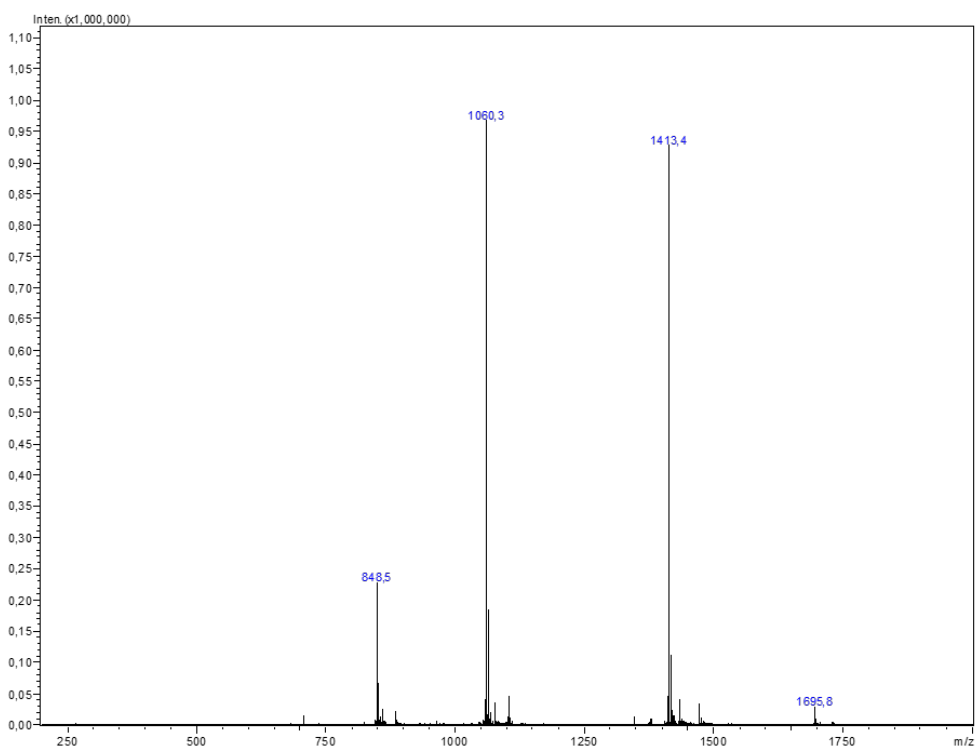

**Figure S7:** ESI-MS (positive mode) of Y2.  $m/z$  corresponds to molecular composition as follows:  $m/z$  corresponds to molecular composition as follows: 1695.8  $[2M+5H]^{5+}$ , 1413.4  $[M+3H]^{3+}$ , 1060.3  $[M+4H]^{4+}$ , 848.5  $[M+5H]^{5+}$ .

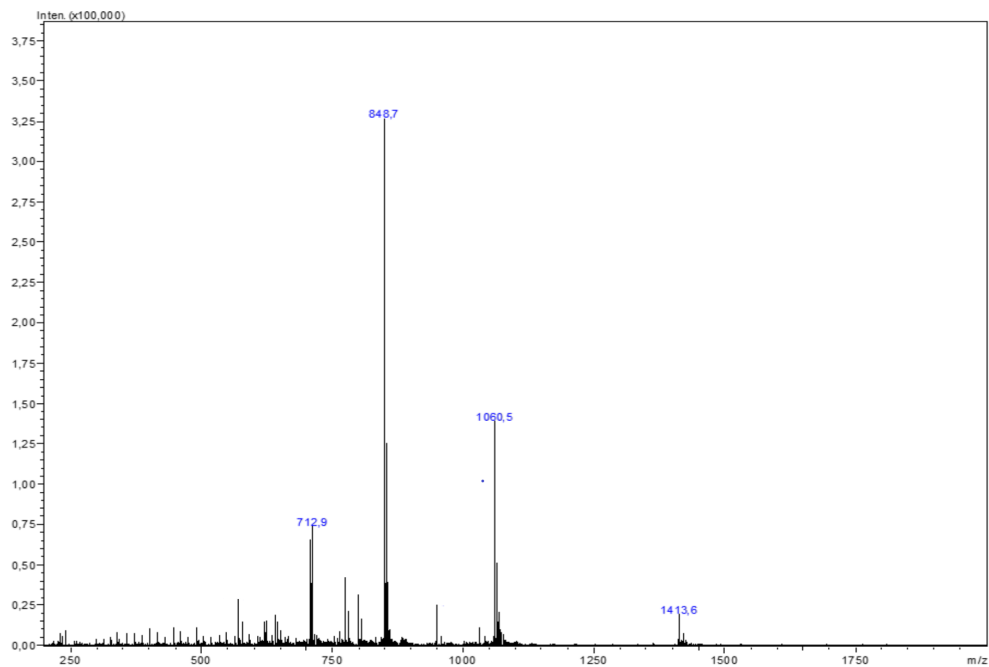

**Figure S8:** ESI-MS (positive mode) of Y2Y.  $m/z$  corresponds to molecular composition as follows:  $m/z$  corresponds to molecular composition as follows: 1413.6  $[M+3H]^{3+}$ , 1060.5  $[M+4H]^{4+}$ , 848.7  $[M+5H]^{5+}$ , 712.9  $[M+6H]^{6+}$ .

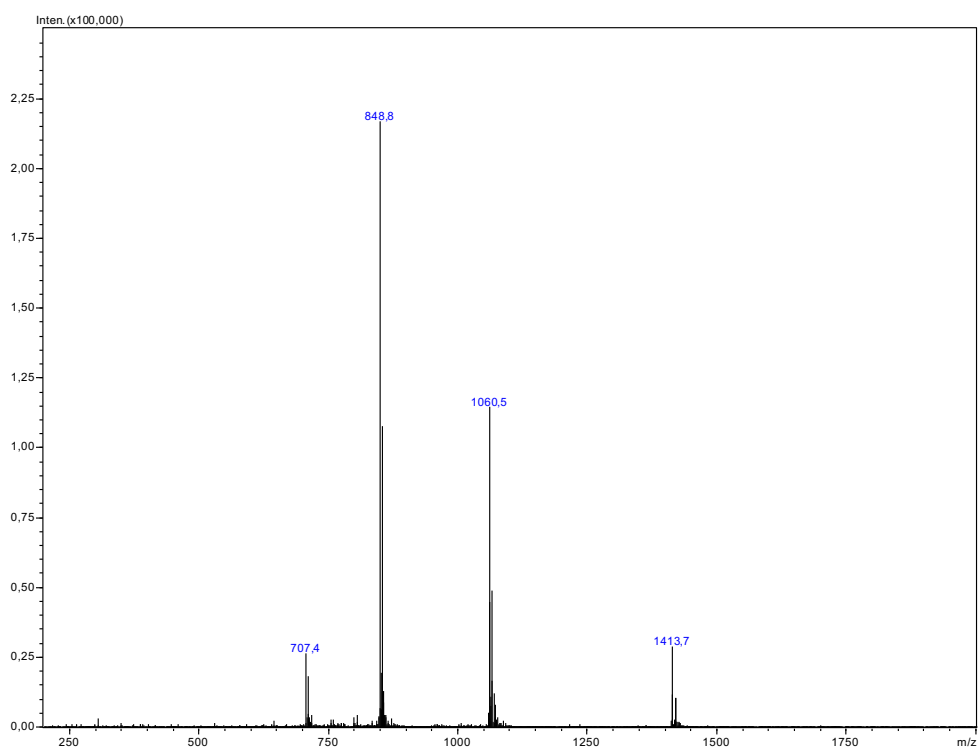

**Figure S9:** ESI-MS (positive mode) of Y2F.  $m/z$  corresponds to molecular composition as follows:  $m/z$  corresponds to molecular composition as follows: 1413.7  $[M+3H]^{3+}$ , 1060.5  $[M+4H]^{4+}$ , 848.8  $[M+5H]^{5+}$ , 707.4  $[M+6H]^{6+}$ .

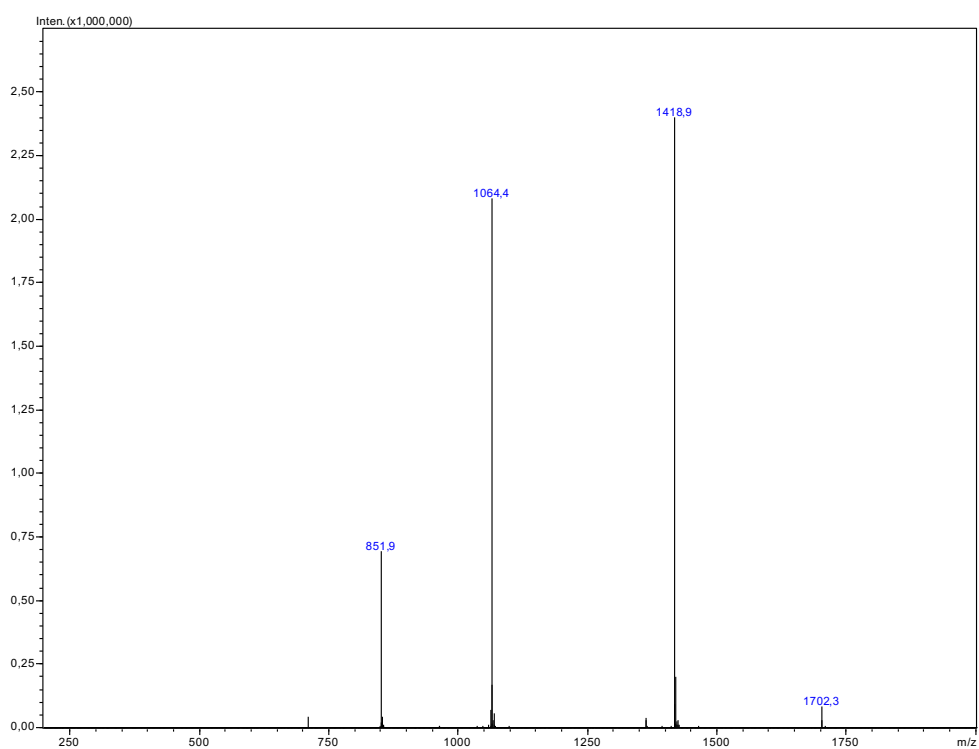

**Figure 10:** ESI-MS (positive mode) of Y3Y.  $m/z$  corresponds to molecular composition as follows:  $m/z$  corresponds to molecular composition as follows: 1702.3  $[2M+5H]^{5+}$ , 1418.9  $[M+3H]^{3+}$ , 1064.4  $[M+4H]^{4+}$ , 851.9  $[M+5H]^{5+}$ .

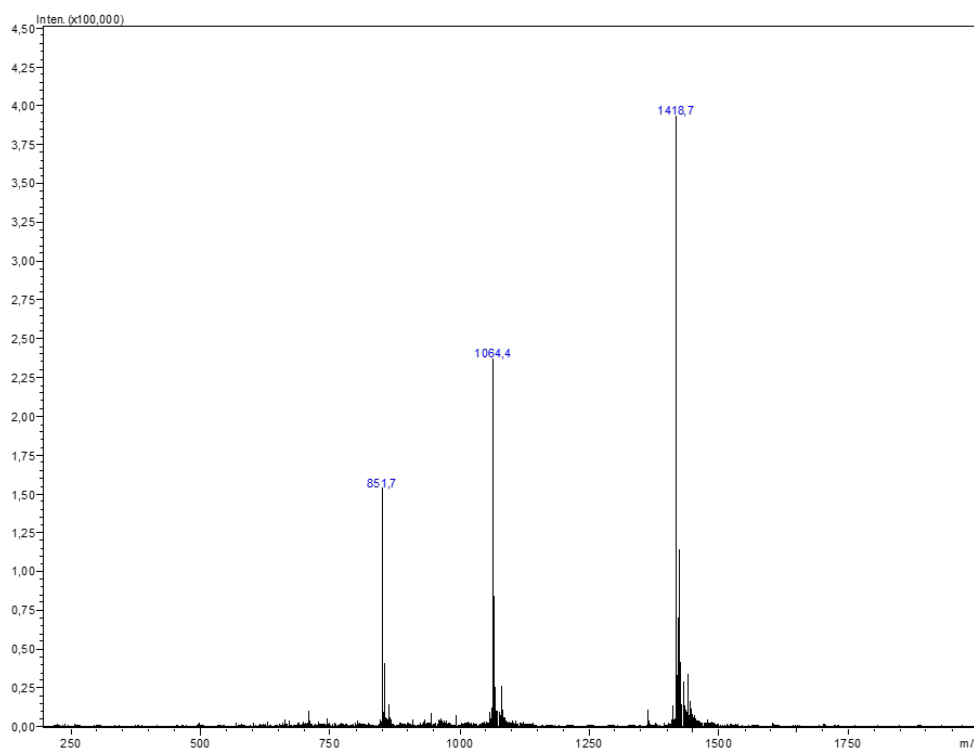

**Figure S11:** ESI-MS (positive mode) of **Y3F**.  $m/z$  corresponds to molecular composition as follows:  $m/z$  corresponds to molecular composition as follows: 1418.7  $[M+3H]^{3+}$ , 1064.4  $[M+4H]^{4+}$ , 851.7  $[M+5H]^{5+}$ .

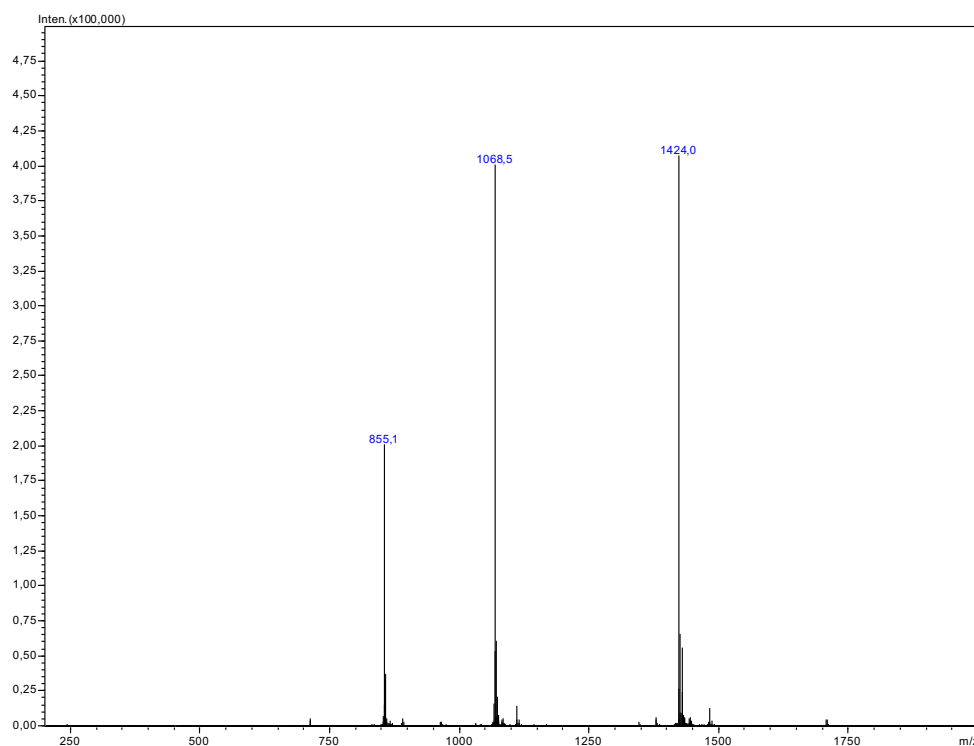

**Figure S12:** ESI-MS (positive mode) of **Y4**.  $m/z$  corresponds to molecular composition as follows:  $m/z$  corresponds to molecular composition as follows: 1424.0  $[M+3H]^{3+}$ , 1068.5  $[M+4H]^{4+}$ , 855.1  $[M+5H]^{5+}$ .

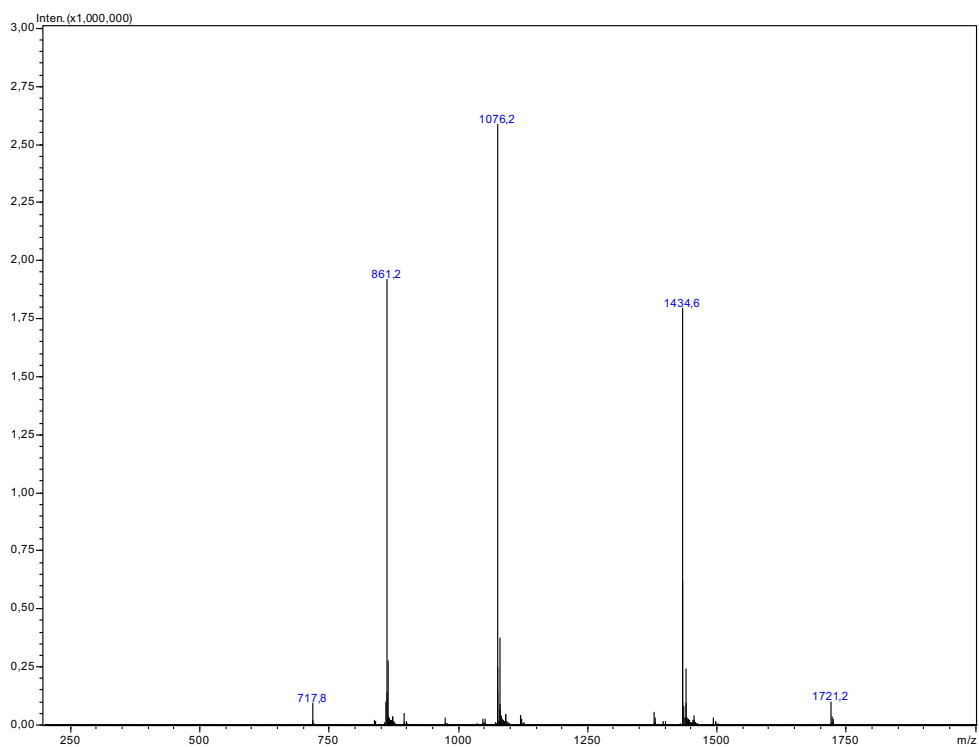

**Figure 13:** ESI-MS (positive mode) of **Y6**.  $m/z$  corresponds to molecular composition as follows:  $m/z$  corresponds to molecular composition as follows: 1721.2  $[2M+5H]^{5+}$ , 1434.6  $[M+3H]^{3+}$ , 1076.2  $[M+4H]^{4+}$ , 861.2  $[M+5H]^{5+}$ , 717.8  $[M+6H]^{6+}$ .



### 3. HPLC Chromatograms of <sup>nat</sup>Ga-complexed trimers

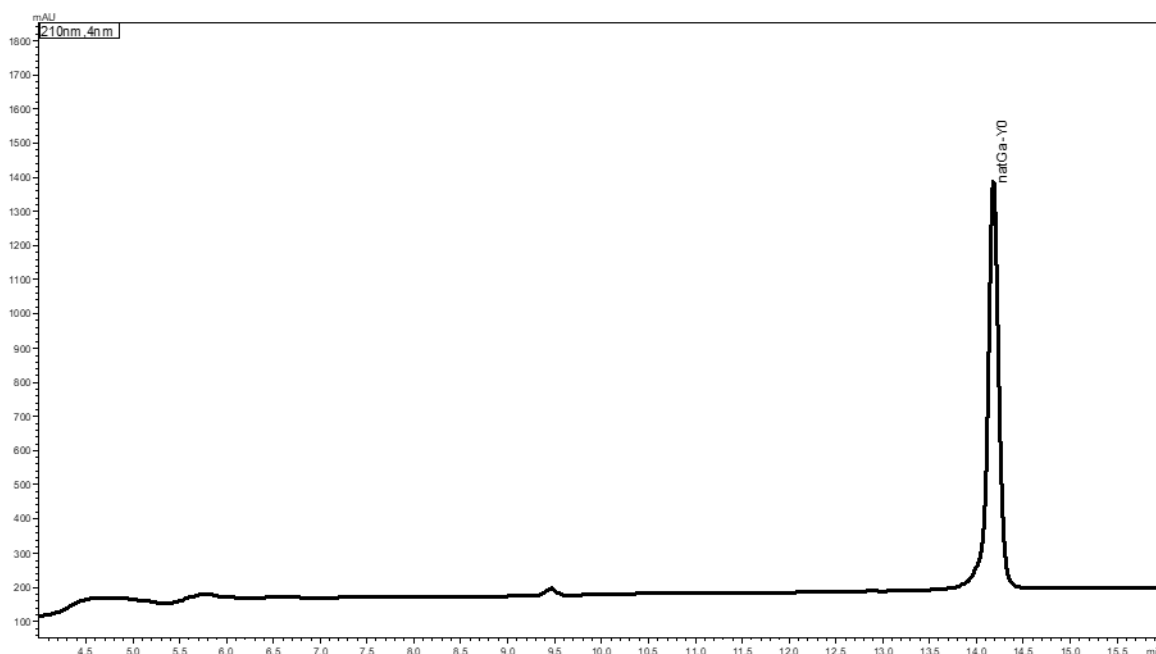

**Figure S14:** Analytical HPLC (UV 210 nm) of <sup>nat</sup>Ga-Y0. HPLC analysis was performed using analytical column C2, 0.75 mL/min; gradient: 10–50% MeCN in H<sub>2</sub>O containing 0.1% TFA in 15 min.  $t_R = 14.2$  min. Compound Purity = 98% determined by 210 nm wavelength.

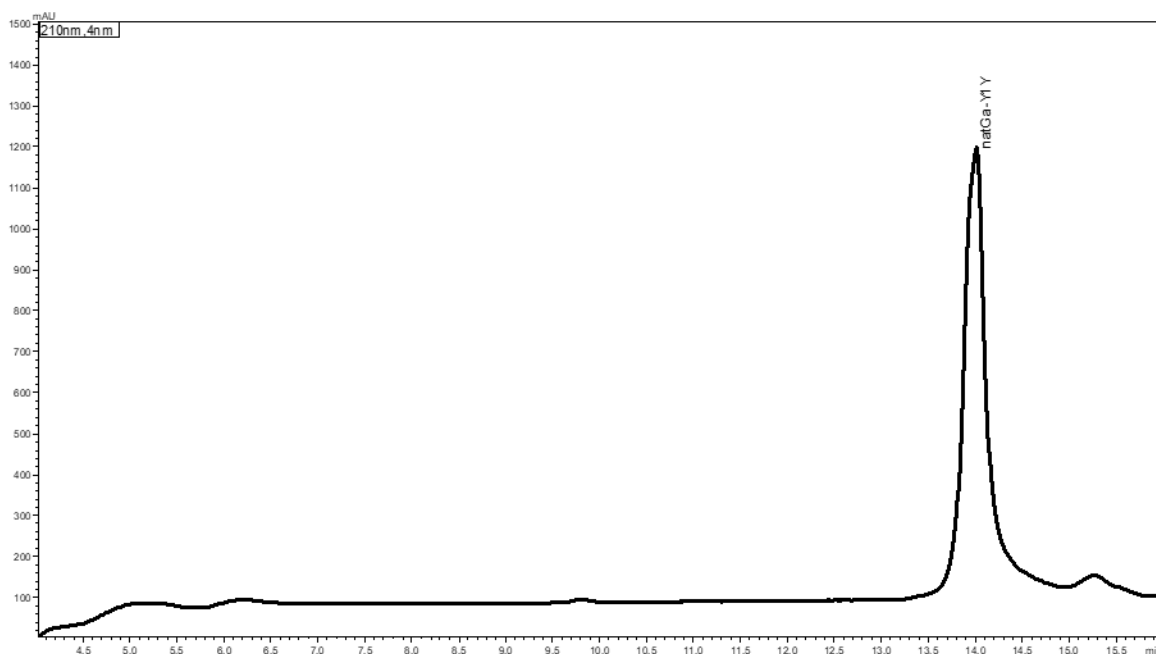

**Figure S15:** Analytical HPLC (UV 210 nm) of <sup>nat</sup>Ga-Y1Y. HPLC analysis was performed using analytical column C2, 0.75 mL/min; gradient: 10–50% MeCN in H<sub>2</sub>O containing 0.1% TFA in 15 min.  $t_R = 14.0$  min. Compound Purity = 96% determined by 210 nm wavelength.

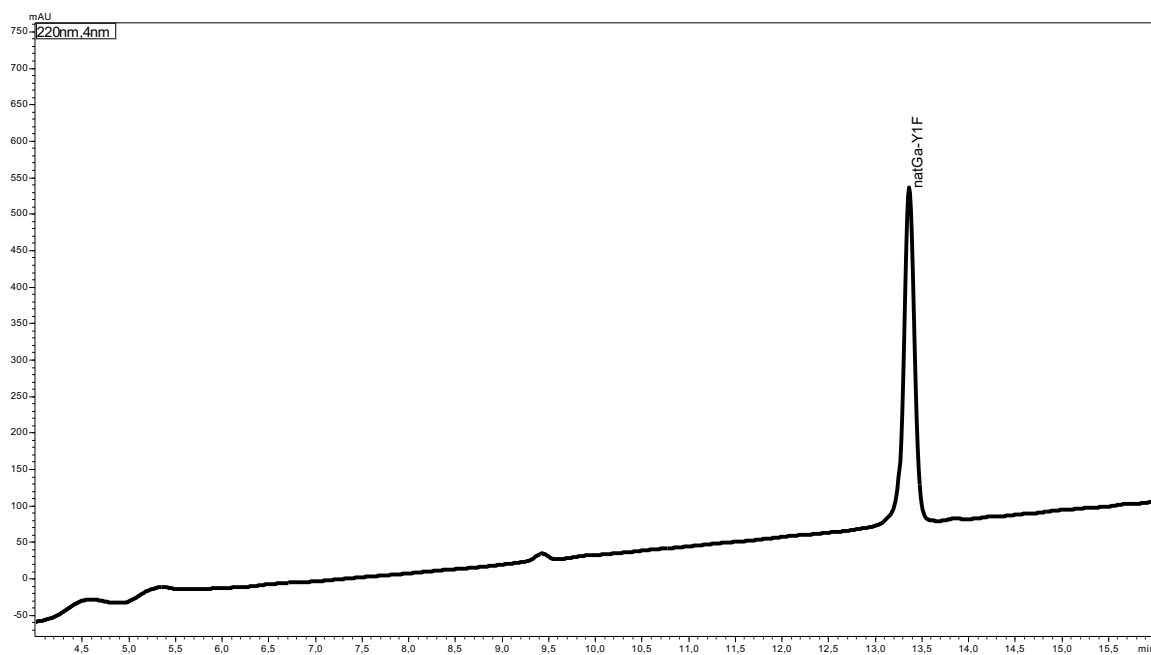

**Figure S16:** Analytical HPLC-UV (210 nm) of <sup>nat</sup>Ga-Y1F. HPLC analysis was performed using analytical column C2, 0.75 mL/min; gradient: 10–50% MeCN in H<sub>2</sub>O containing 0.1% TFA in 15 min.  $t_R$  = 13.4 min. Compound Purity = 98% determined by 210 nm wavelength.

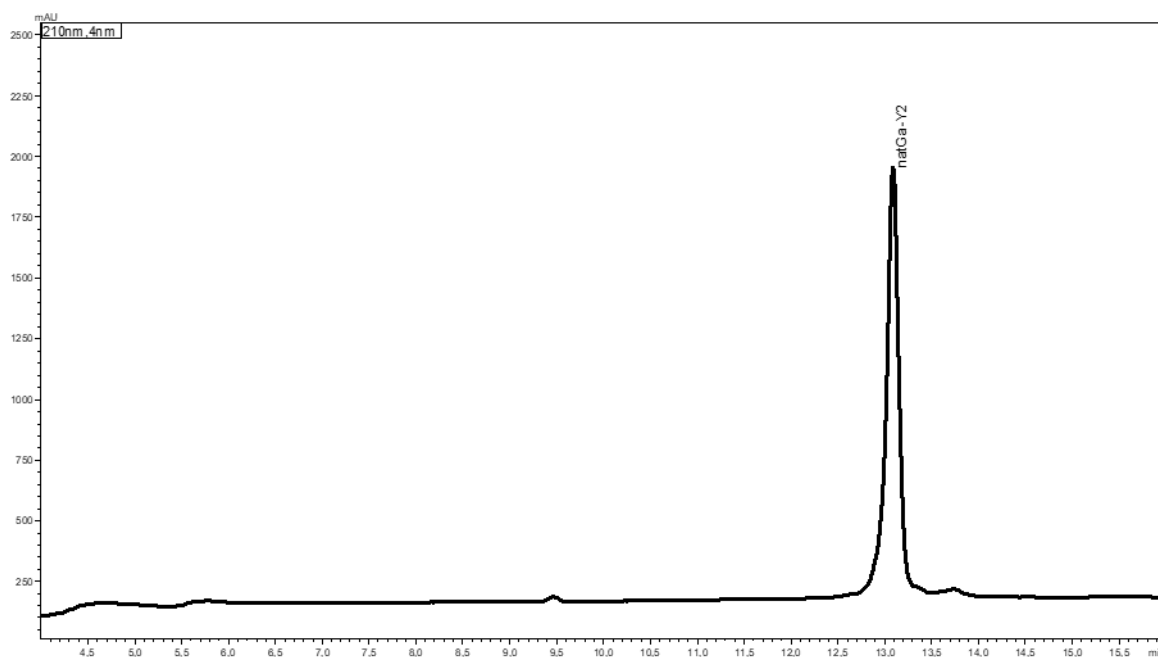

**Figure S17:** Analytical HPLC (UV 210 nm) of <sup>nat</sup>Ga-Y2. HPLC analysis was performed using analytical column C2, 0.75 mL/min; gradient: 10–50% MeCN in H<sub>2</sub>O containing 0.1% TFA in 15 min.  $t_R$  = 13.1 min. Compound Purity = 98% determined by 210 nm wavelength.

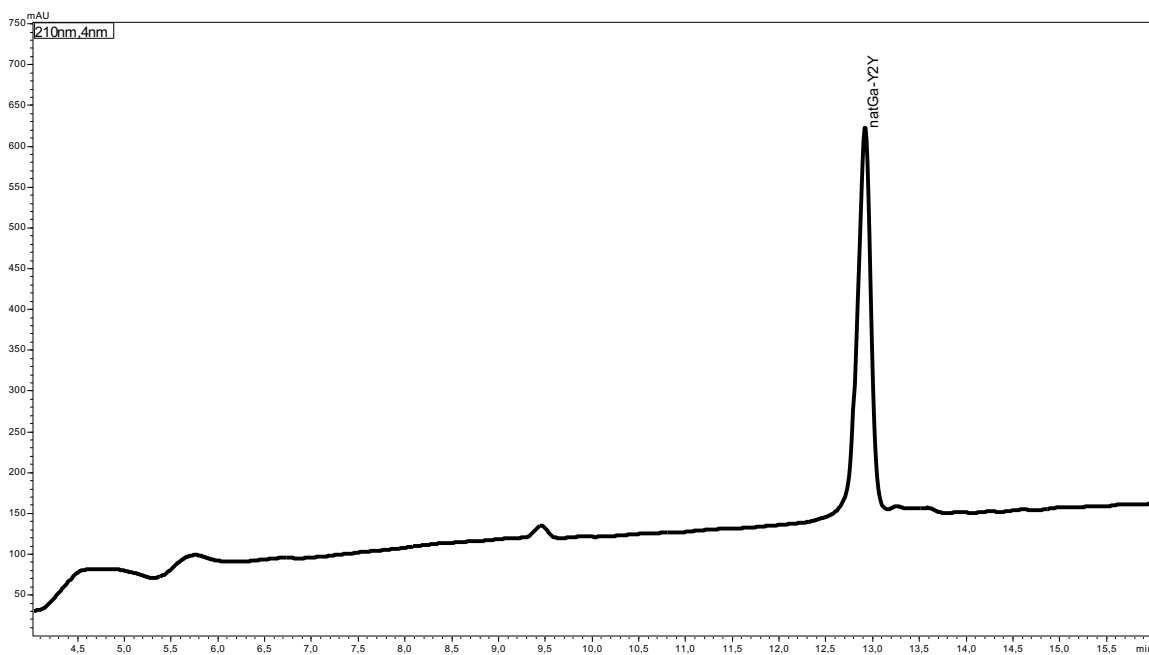

**Figure S18:** Analytical HPLC (UV 210 nm) of <sup>nat</sup>Ga-Y2Y. HPLC analysis was performed using analytical column C2, 0.75 mL/min; gradient: 10–50% MeCN in H<sub>2</sub>O containing 0.1% TFA in 15 min.  $t_R = 12.9$  min. Compound Purity = 95% determined by 210 nm wavelength.

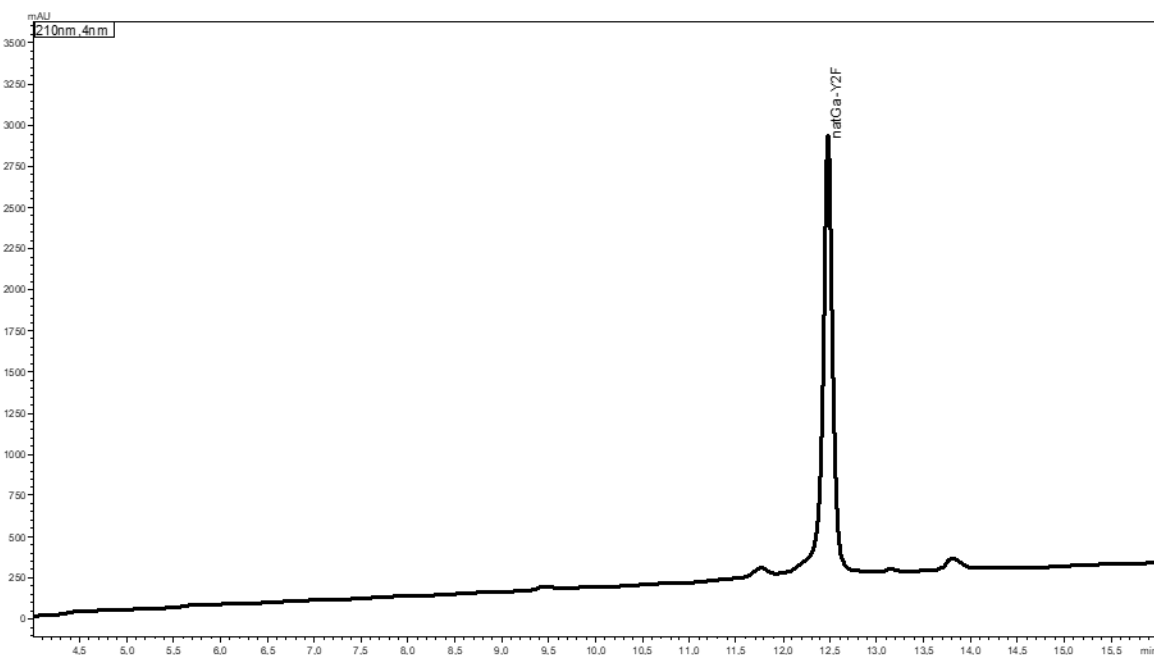

**Figure S19:** Analytical HPLC (UV 210 nm) of <sup>nat</sup>Ga-Y2F. HPLC analysis was performed using analytical column C2, 0.75 mL/min; gradient: 10–50% MeCN in H<sub>2</sub>O containing 0.1% TFA in 15 min.  $t_R = 12.5$  min. Compound Purity = 95% determined by 210 nm wavelength.

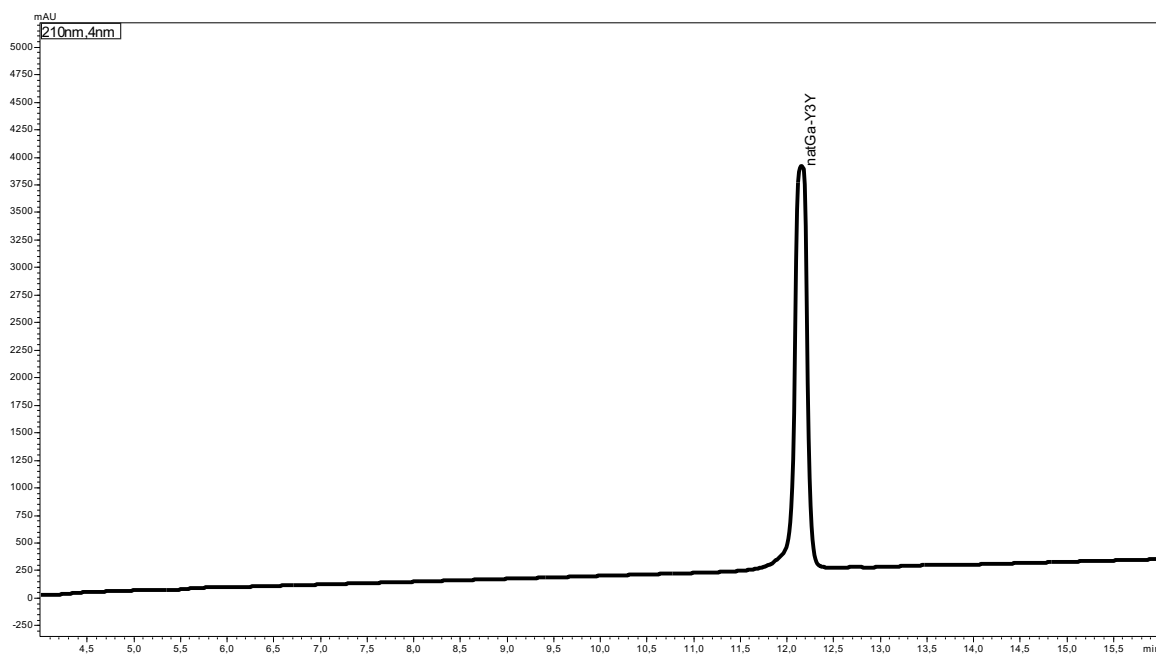

**Figure S20:** Analytical HPLC (UV 210 nm) of  $^{nat}\text{Ga-Y3Y}$ . HPLC analysis was performed using analytical column C2, 0.75 mL/min; gradient: 10–50% MeCN in  $\text{H}_2\text{O}$  containing 0.1% TFA in 15 min.  $t_R = 12.2$  min. Compound Purity = 99% determined by 210 nm wavelength.

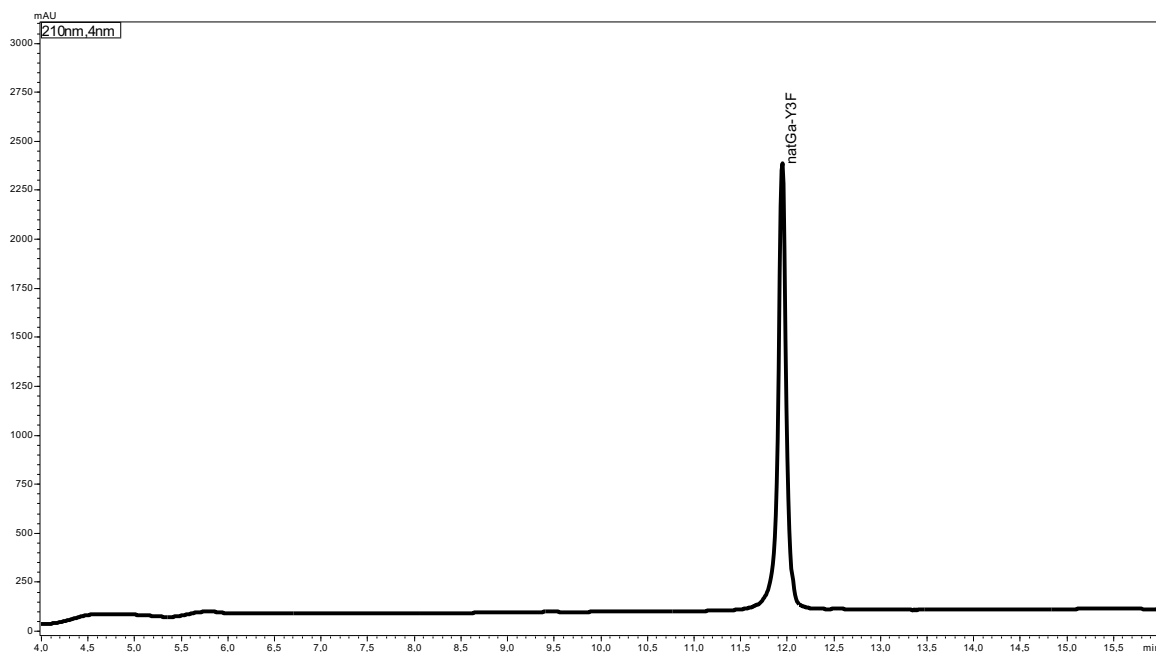

**Figure S21:** Analytical HPLC (UV 210 nm) of  $^{nat}\text{Ga-Y3F}$ . HPLC analysis was performed using analytical column C2, 0.75 mL/min; gradient: 10–50% MeCN in  $\text{H}_2\text{O}$  containing 0.1% TFA in 15 min.  $t_R = 12$  min. Compound Purity = 99% determined by 210 nm wavelength.

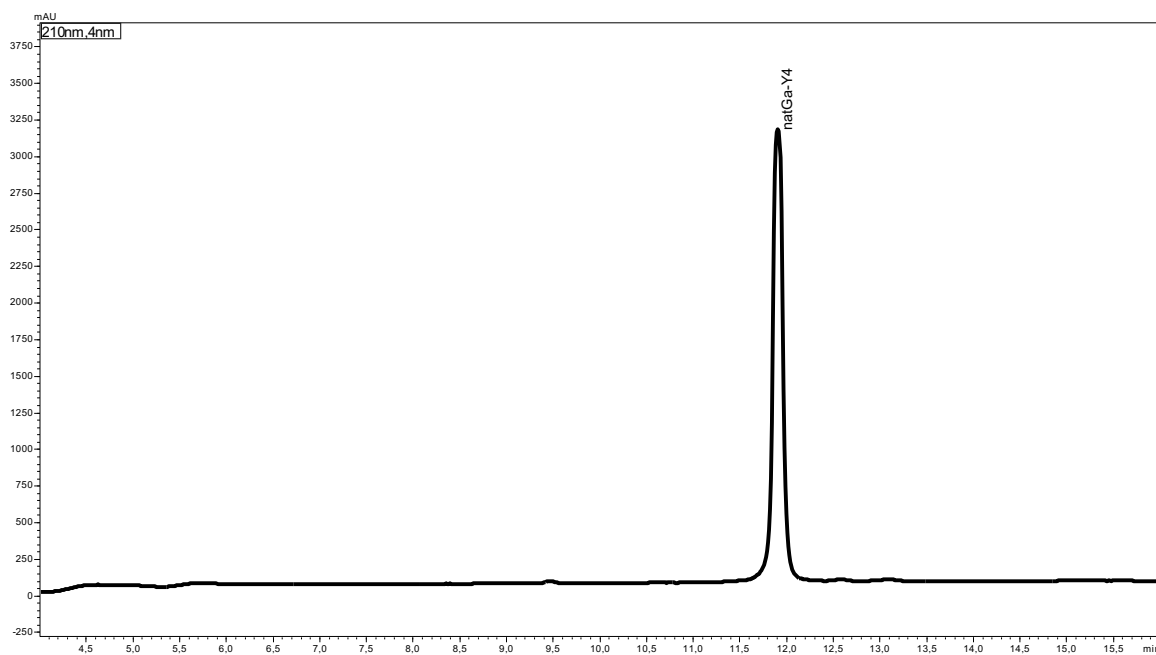

**Figure S22:** Analytical HPLC (UV 210 nm) of <sup>nat</sup>Ga-Y4. HPLC analysis was performed using analytical column C2, 0.75 mL/min; gradient: 10–50% MeCN in H<sub>2</sub>O containing 0.1% TFA in 15 min.  $t_R$  = 11.9 min. Compound Purity = 98% determined by 210 nm wavelength.

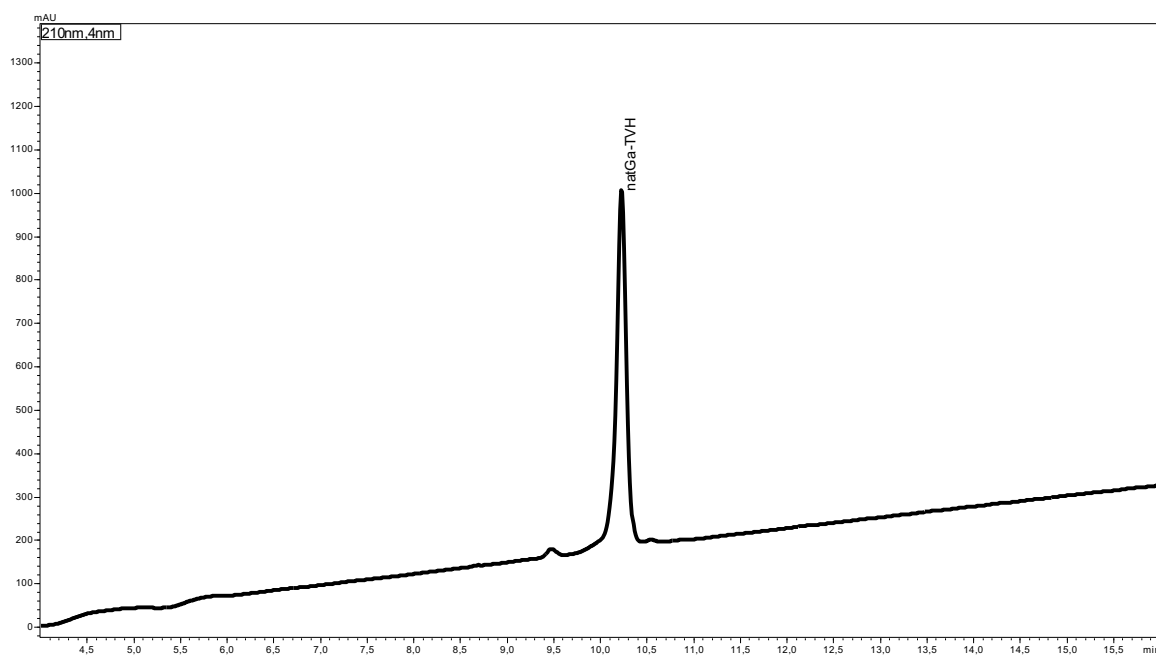

**Figure S23:** Analytical HPLC (UV 210 nm) of <sup>nat</sup>Ga-Y6 (<sup>nat</sup>Ga-Trivehexin). HPLC analysis was performed using analytical column C2, 0.75 mL/min; gradient: 10–50% MeCN in H<sub>2</sub>O containing 0.1% TFA in 15 min.  $t_R$  = 10.2 min. Compound Purity = 98% determined by 210 nm wavelength.

## 4. Biodistribution data

**Table S1:** Biodistribution data (90 min p.i.) for  $^{68}\text{Ga-Y0}$  without ( $n = 6$ ;  $66 \pm 8$  pmol) and with ( $n = 3$ ) addition of 50 nmol of TRAP(AvB6)<sub>3</sub>, in H2009 bearing SCID mice. Data are given as averages  $\pm$  standard deviation. %IA/g = percent injected activity per gram tissue.

| Organ/Tissue            | $^{68}\text{Ga-Y0}$ |                   | + 50 nmol cold<br>10 min prior to activity |
|-------------------------|---------------------|-------------------|--------------------------------------------|
|                         | %IA/g               | tumor/organ ratio |                                            |
| Blood                   | 4.01 $\pm$ 0.74     | 2.2 $\pm$ 0.5     | 2.39 $\pm$ 0.79                            |
| Heart (myocard)         | 2.13 $\pm$ 0.42     | 4.2 $\pm$ 0.8     | 1.93 $\pm$ 0.37                            |
| Lung                    | 16.87 $\pm$ 5.34    | 0.6 $\pm$ 0.2     | 5.66 $\pm$ 1.47                            |
| Liver                   | 7.55 $\pm$ 0.78     | 1.2 $\pm$ 0.2     | 7.65 $\pm$ 1.93                            |
| Spleen                  | 5.21 $\pm$ 1.05     | 1.7 $\pm$ 0.4     | 2.56 $\pm$ 0.29                            |
| Pancreas                | 0.91 $\pm$ 0.22     | 10.1 $\pm$ 2.8    | 0.99 $\pm$ 0.15                            |
| Stomach (empty)         | 10.26 $\pm$ 1.62    | 0.9 $\pm$ 0.2     | 1.46 $\pm$ 0.22                            |
| Small intestine (empty) | 4.20 $\pm$ 1.07     | 2.2 $\pm$ 0.4     | 1.16 $\pm$ 0.09                            |
| Large intestine (empty) | 5.74 $\pm$ 1.36     | 1.6 $\pm$ 0.4     | 1.29 $\pm$ 0.16                            |
| Kidneys                 | 90.74 $\pm$ 6.70    | 0.1 $\pm$ 0.0     | 61.56 $\pm$ 5.90                           |
| Adrenals                | 2.40 $\pm$ 0.38     | 3.7 $\pm$ 0.7     | 1.54 $\pm$ 0.43                            |
| Muscle                  | 1.10 $\pm$ 0.22     | 8.1 $\pm$ 1.3     | 0.50 $\pm$ 0.11                            |
| Tumor H2009             | 8.73 $\pm$ 0.81     |                   | 2.51 $\pm$ 0.24                            |

**Table S2:** Biodistribution data (90 min p.i.) for  $^{68}\text{Ga-Y1Y}$  without ( $n = 5$ ;  $95 \pm 55$  pmol) and with ( $n = 3$ ) addition of 50 nmol of non-labeled compound, in H2009 bearing SCID mice. Data are given as averages  $\pm$  standard deviation. %IA/g = percent injected activity per gram tissue.

| Organ/Tissue            | $^{68}\text{Ga-Y1Y}$ |                   | + 50 nmol cold<br>10 min prior to activity |
|-------------------------|----------------------|-------------------|--------------------------------------------|
|                         | %IA/g                | tumor/organ ratio |                                            |
| Blood                   | 2.54 $\pm$ 0.37      | 3.2 $\pm$ 0.7     | 1.64 $\pm$ 0.67                            |
| Heart (myocard)         | 1.54 $\pm$ 0.61      | 5.7 $\pm$ 2.0     | 1.15 $\pm$ 0.34                            |
| Lung                    | 6.76 $\pm$ 2.02      | 1.2 $\pm$ 0.2     | 3.92 $\pm$ 0.97                            |
| Liver                   | 4.39 $\pm$ 0.46      | 1.8 $\pm$ 0.3     | 4.61 $\pm$ 0.05                            |
| Spleen                  | 3.85 $\pm$ 0.86      | 2.2 $\pm$ 0.5     | 2.08 $\pm$ 0.25                            |
| Pancreas                | 0.64 $\pm$ 0.11      | 12.7 $\pm$ 2.9    | 0.65 $\pm$ 0.12                            |
| Stomach (empty)         | 6.78 $\pm$ 0.72      | 1.2 $\pm$ 0.2     | 1.12 $\pm$ 0.19                            |
| Small intestine (empty) | 2.72 $\pm$ 0.36      | 3.0 $\pm$ 0.7     | 1.11 $\pm$ 0.16                            |
| Large intestine (empty) | 4.10 $\pm$ 0.84      | 2.0 $\pm$ 0.5     | 1.01 $\pm$ 0.34                            |
| Kidneys                 | 91.21 $\pm$ 9.95     | 0.1 $\pm$ 0.0     | 65.79 $\pm$ 13.01                          |
| Adrenals                | 1.57 $\pm$ 0.41      | 5.3 $\pm$ 1.5     | 1.30 $\pm$ 0.42                            |
| Muscle                  | 0.75 $\pm$ 0.17      | 11.2 $\pm$ 3.4    | 0.34 $\pm$ 0.08                            |
| Tumor H2009             | 8.16 $\pm$ 2.01      |                   | 1.50 $\pm$ 0.64                            |

**Table S3:** Biodistribution data (90 min p.i.) for <sup>68</sup>Ga-Y1F without (n = 5; 68 ± 26 pmol) and with (n = 3) addition of 50 nmol of non-labeled compound, in H2009 bearing SCID mice. Data are given as averages ± standard deviation. %IA/g = percent injected activity per gram tissue.

| Organ/Tissue            | <sup>68</sup> Ga-Y1F |                   | + 50 nmol cold           |
|-------------------------|----------------------|-------------------|--------------------------|
|                         | %IA/g                | tumor/organ ratio | 10 min prior to activity |
| Blood                   | 2.57 ± 0.33          | 3.2 ± 0.6         | 2.39 ± 0.35              |
| Heart (myocard)         | 1.20 ± 0.16          | 6.8 ± 1.2         | 1.16 ± 0.14              |
| Lung                    | 8.81 ± 0.64          | 0.9 ± 0.1         | 4.10 ± 0.93              |
| Liver                   | 3.86 ± 0.17          | 2.1 ± 0.4         | 3.30 ± 0.40              |
| Spleen                  | 3.48 ± 0.49          | 2.4 ± 0.2         | 1.80 ± 0.47              |
| Pancreas                | 0.61 ± 0.10          | 13.3 ± 2.3        | 0.57 ± 0.11              |
| Stomach (empty)         | 7.37 ± 1.23          | 1.1 ± 0.3         | 1.07 ± 0.14              |
| Small intestine (empty) | 2.86 ± 0.57          | 2.9 ± 0.9         | 1.07 ± 0.10              |
| Large intestine (empty) | 4.43 ± 1.28          | 2.0 ± 0.9         | 0.95 ± 0.10              |
| Kidneys                 | 111.14 ± 15.33       | 0.1 ± 0.0         | 74.29 ± 4.22             |
| Adrenals                | 1.26 ± 0.24          | 6.5 ± 0.8         | 1.51 ± 0.61              |
| Muscle                  | 0.97 ± 0.48          | 9.5 ± 3.2         | 0.36 ± 0.03              |
| Tumor H2009             | 8.08 ± 1.35          |                   | 1.80 ± 0.12              |

**Table S4:** Biodistribution data (90 min p.i.) for <sup>68</sup>Ga-Y2 without (n = 5; 153 ± 11 pmol) and with (n = 3) addition of 50 nmol of non-labeled compound, in H2009 bearing SCID mice. Data are given as averages ± standard deviation. %IA/g = percent injected activity per gram tissue.

| Organ/Tissue            | <sup>68</sup> Ga-Y2 |                   | + 50 nmol cold           |
|-------------------------|---------------------|-------------------|--------------------------|
|                         | %IA/g               | tumor/organ ratio | 10 min prior to activity |
| Blood                   | 2.26 ± 0.26         | 3.5 ± 0.5         | 1.75 ± 0.34              |
| Heart (myocard)         | 1.08 ± 0.13         | 7.4 ± 0.6         | 0.83 ± 0.03              |
| Lung                    | 4.80 ± 0.50         | 1.7 ± 0.2         | 3.15 ± 0.32              |
| Liver                   | 3.37 ± 0.68         | 2.4 ± 0.4         | 3.43 ± 0.59              |
| Spleen                  | 2.51 ± 0.33         | 3.2 ± 0.7         | 1.91 ± 0.39              |
| Pancreas                | 0.65 ± 0.12         | 12.7 ± 2.9        | 0.57 ± 0.12              |
| Stomach (empty)         | 7.17 ± 0.58         | 1.1 ± 0.1         | 1.15 ± 0.12              |
| Small intestine (empty) | 2.55 ± 0.27         | 3.1 ± 0.5         | 0.78 ± 0.11              |
| Large intestine (empty) | 3.81 ± 0.53         | 2.1 ± 0.2         | 0.96 ± 0.13              |
| Kidneys                 | 91.99 ± 12.24       | 0.1 ± 0.0         | 71.99 ± 7.05             |
| Adrenals                | 1.50 ± 1.28         | 8.8 ± 6.2         | 1.46 ± 0.35              |
| Muscle                  | 0.72 ± 0.15         | 11.4 ± 2.4        | 0.24 ± 0.05              |
| Tumor H2009             | 7.95 ± 1.02         |                   | 1.47 ± 0.19              |

**Table S5:** Biodistribution data (90 min p.i.) for <sup>68</sup>Ga-Y2Y without (n = 5; 101 ± 35 pmol) and with (n = 3) addition of 50 nmol of non-labeled compound, in H2009 bearing SCID mice. Data are given as averages ± standard deviation. %IA/g = percent injected activity per gram tissue.

| Organ/Tissue            | <sup>68</sup> Ga-Y2Y |                   | + 50 nmol cold           |
|-------------------------|----------------------|-------------------|--------------------------|
|                         | %IA/g                | tumor/organ ratio | 10 min prior to activity |
| Blood                   | 1.91 ± 0.49          | 4.4 ± 1.1         | 1.21 ± 0.13              |
| Heart (myocard)         | 0.85 ± 0.16          | 9.6 ± 1.8         | 0.74 ± 0.10              |
| Lung                    | 7.02 ± 1.34          | 1.2 ± 0.2         | 3.15 ± 0.69              |
| Liver                   | 2.59 ± 0.35          | 3.1 ± 0.3         | 2.37 ± 0.34              |
| Spleen                  | 4.36 ± 0.79          | 1.9 ± 0.4         | 1.55 ± 0.15              |
| Pancreas                | 0.44 ± 0.07          | 18.2 ± 2.3        | 0.45 ± 0.10              |
| Stomach (empty)         | 6.55 ± 1.48          | 1.3 ± 0.3         | 0.83 ± 0.18              |
| Small intestine (empty) | 2.23 ± 0.41          | 3.6 ± 0.7         | 0.52 ± 0.05              |
| Large intestine (empty) | 3.89 ± 0.73          | 2.1 ± 0.4         | 0.65 ± 0.17              |
| Kidneys                 | 80.77 ± 5.12         | 0.1 ± 0.0         | 57.09 ± 6.23             |
| Adrenals                | 1.07 ± 0.27          | 7.8 ± 1.7         | 1.11 ± 0.34              |
| Muscle                  | 0.63 ± 0.12          | 13.0 ± 2.5        | 0.27 ± 0.14              |
| Tumor H2009             | 7.93 ± 0.28          |                   | 1.21 ± 0.17              |

**Table S6:** Biodistribution data (90 min p.i.) for <sup>68</sup>Ga-Y2F without (n = 5; 110 ± 24 pmol) and with (n = 3) addition of 50 nmol of non-labeled compound, in H2009 bearing SCID mice. Data are given as averages ± standard deviation. %IA/g = percent injected activity per gram tissue.

| Organ/Tissue            | <sup>68</sup> Ga-Y2F |                   | + 50 nmol cold           |
|-------------------------|----------------------|-------------------|--------------------------|
|                         | %IA/g                | tumor/organ ratio | 10 min prior to activity |
| Blood                   | 1.62 ± 0.20          | 4.9 ± 1.0         | 0.82 ± 0.08              |
| Heart (myocard)         | 0.76 ± 0.06          | 10.6 ± 2.0        | 0.46 ± 0.04              |
| Lung                    | 5.62 ± 1.34          | 1.4 ± 0.2         | 2.03 ± 0.09              |
| Liver                   | 2.09 ± 0.17          | 3.8 ± 0.9         | 1.86 ± 0.25              |
| Spleen                  | 3.84 ± 1.14          | 2.2 ± 0.5         | 1.02 ± 0.38              |
| Pancreas                | 0.38 ± 0.04          | 20.8 ± 3.9        | 0.26 ± 0.06              |
| Stomach (empty)         | 6.99 ± 3.40          | 1.3 ± 0.3         | 0.65 ± 0.13              |
| Small intestine (empty) | 2.51 ± 0.50          | 3.2 ± 0.4         | 0.55 ± 0.05              |
| Large intestine (empty) | 3.96 ± 1.16          | 2.1 ± 0.5         | 0.54 ± 0.08              |
| Kidneys                 | 107.37 ± 7.49        | 0.1 ± 0.0         | 75.63 ± 7.06             |
| Adrenals                | 0.84 ± 0.07          | 9.6 ± 2.2         | 0.64 ± 0.12              |
| Muscle                  | 0.66 ± 0.12          | 12.2 ± 1.5        | 0.14 ± 0.02              |
| Tumor H2009             | 7.99 ± 1.62          |                   | 1.03 ± 0.35              |



**Table S7:** Biodistribution data (90 min p.i.) for  $^{68}\text{Ga-Y3Y}$  without ( $n = 5$ ;  $109 \pm 7$  pmol) and with ( $n = 3$ ) addition of 50 nmol of non-labeled compound, in H2009 bearing SCID mice. Data are given as averages  $\pm$  standard deviation. %IA/g = percent injected activity per gram tissue.

| Organ/Tissue            | $^{68}\text{Ga-Y3Y}$ |                   | + 50 nmol cold<br>10 min prior to activity |
|-------------------------|----------------------|-------------------|--------------------------------------------|
|                         | %IA/g                | tumor/organ ratio |                                            |
| Blood                   | 1.13 $\pm$ 0.25      | 4.9 $\pm$ 0.5     | 0.56 $\pm$ 0.18                            |
| Heart (myocard)         | 0.66 $\pm$ 0.16      | 8.5 $\pm$ 1.1     | 0.45 $\pm$ 0.12                            |
| Lung                    | 4.96 $\pm$ 0.48      | 1.0 $\pm$ 0.2     | 2.24 $\pm$ 0.57                            |
| Liver                   | 1.23 $\pm$ 0.19      | 4.4 $\pm$ 0.7     | 1.40 $\pm$ 0.43                            |
| Spleen                  | 3.82 $\pm$ 0.82      | 1.4 $\pm$ 0.2     | 1.06 $\pm$ 0.12                            |
| Pancreas                | 0.33 $\pm$ 0.07      | 17.0 $\pm$ 1.4    | 0.20 $\pm$ 0.07                            |
| Stomach (empty)         | 4.03 $\pm$ 1.36      | 1.5 $\pm$ 0.7     | 0.47 $\pm$ 0.12                            |
| Small intestine (empty) | 1.69 $\pm$ 0.20      | 3.2 $\pm$ 0.6     | 0.41 $\pm$ 0.15                            |
| Large intestine (empty) | 3.94 $\pm$ 1.85      | 1.8 $\pm$ 1.1     | 0.58 $\pm$ 0.24                            |
| Kidneys                 | 72.57 $\pm$ 5.25     | 0.1 $\pm$ 0.0     | 57.16 $\pm$ 3.56                           |
| Adrenals                | 0.81 $\pm$ 0.41      | 6.7 $\pm$ 3.0     | 0.29 $\pm$ 0.15                            |
| Muscle                  | 0.51 $\pm$ 0.11      | 10.7 $\pm$ 1.1    | 0.14 $\pm$ 0.08                            |
| Tumor H2009             | 5.92 $\pm$ 2.07      |                   | 0.95 $\pm$ 0.14                            |

**Table S8:** Biodistribution data (90 min p.i.) for  $^{68}\text{Ga-Y3F}$  without ( $n = 5$ ;  $93 \pm 6$  pmol) and with ( $n = 3$ ) addition of 50 nmol of non-labeled compound, in H2009 bearing SCID mice. Data are given as averages  $\pm$  standard deviation. %IA/g = percent injected activity per gram tissue.

| Organ/Tissue            | $^{68}\text{Ga-Y3F}$ |                   | + 50 nmol cold<br>10 min prior to activity |
|-------------------------|----------------------|-------------------|--------------------------------------------|
|                         | %IA/g                | tumor/organ ratio |                                            |
| Blood                   | 0.96 $\pm$ 0.30      | 7.2 $\pm$ 1.1     | 0.43 $\pm$ 0.16                            |
| Heart (myocard)         | 0.62 $\pm$ 0.15      | 10.9 $\pm$ 0.8    | 0.34 $\pm$ 0.09                            |
| Lung                    | 4.83 $\pm$ 1.54      | 1.5 $\pm$ 0.3     | 1.60 $\pm$ 0.60                            |
| Liver                   | 0.95 $\pm$ 0.22      | 7.1 $\pm$ 0.7     | 1.00 $\pm$ 0.40                            |
| Spleen                  | 2.38 $\pm$ 0.31      | 2.8 $\pm$ 0.4     | 1.04 $\pm$ 0.22                            |
| Pancreas                | 0.34 $\pm$ 0.11      | 20.4 $\pm$ 3.1    | 0.15 $\pm$ 0.06                            |
| Stomach (empty)         | 5.64 $\pm$ 1.94      | 1.3 $\pm$ 0.3     | 0.55 $\pm$ 0.08                            |
| Small intestine (empty) | 2.60 $\pm$ 0.90      | 2.7 $\pm$ 0.5     | 0.33 $\pm$ 0.07                            |
| Large intestine (empty) | 5.15 $\pm$ 2.63      | 1.6 $\pm$ 0.7     | 0.42 $\pm$ 0.09                            |
| Kidneys                 | 71.11 $\pm$ 15.01    | 0.1 $\pm$ 0.0     | 49.29 $\pm$ 4.36                           |
| Adrenals                | 0.77 $\pm$ 0.42      | 10.3 $\pm$ 3.8    | 0.75 $\pm$ 0.46                            |
| Muscle                  | 0.66 $\pm$ 0.25      | 10.9 $\pm$ 3.0    | 0.12 $\pm$ 0.07                            |
| Tumor H2009             | 6.69 $\pm$ 1.21      |                   | 0.89 $\pm$ 0.29                            |

**Table S9:** Biodistribution data (90 min p.i.) for <sup>68</sup>Ga-Y4 without (n = 5; 94 ± 14 pmol) and with (n = 3) addition of 50 nmol of non-labeled compound, in H2009 bearing SCID mice. Data are given as averages ± standard deviation. %IA/g = percent injected activity per gram tissue.

| Organ/Tissue            | <sup>68</sup> Ga-Y4 |                   | + 50 nmol cold           |
|-------------------------|---------------------|-------------------|--------------------------|
|                         | %IA/g               | tumor/organ ratio | 10 min prior to activity |
| Blood                   | 0.86 ± 0.26         | 5.5 ± 1.4         | 0.36 ± 0.02              |
| Heart (myocard)         | 0.47 ± 0.12         | 9.6 ± 1.3         | 0.19 ± 0.04              |
| Lung                    | 3.22 ± 0.63         | 1.4 ± 0.2         | 1.31 ± 0.36              |
| Liver                   | 0.93 ± 0.14         | 5.0 ± 0.5         | 0.84 ± 0.08              |
| Spleen                  | 1.57 ± 0.57         | 3.0 ± 0.7         | 1.00 ± 0.17              |
| Pancreas                | 0.28 ± 0.08         | 16.5 ± 1.6        | 0.12 ± 0.00              |
| Stomach (empty)         | 4.92 ± 1.06         | 1.0 ± 0.3         | 0.47 ± 0.03              |
| Small intestine (empty) | 1.35 ± 0.53         | 3.7 ± 1.0         | 0.27 ± 0.05              |
| Large intestine (empty) | 2.29 ± 0.59         | 2.1 ± 0.6         | 0.34 ± 0.01              |
| Kidneys                 | 91.29 ± 8.28        | 0.1 ± 0.0         | 65.31 ± 8.22             |
| Adrenals                | 0.71 ± 0.37         | 7.1 ± 1.9         | 0.32 ± 0.01              |
| Muscle                  | 01.41 ± 0.06        | 12.2 ± 2.8        | 0.07 ± 0.01              |
| Tumor H2009             | 4.47 ± 0.96         |                   | 0.82 ± 0.09              |

**Table S10:** Biodistribution data (90 min p.i.) for <sup>68</sup>Ga-Y6 (<sup>68</sup>Ga-Trivehexin) without (n = 5; 97 ± 13 pmol) and with (n = 3) addition of 50 nmol of Trivehexin, in H2009 bearing SCID mice. Data are given as averages ± standard deviation. %IA/g = percent injected activity per gram tissue.

| Organ/Tissue            | <sup>68</sup> Ga-Y6 |                   | + 50 nmol cold           |
|-------------------------|---------------------|-------------------|--------------------------|
|                         | %IA/g               | tumor/organ ratio | 10 min prior to activity |
| Blood                   | 1.03 ± 0.21         | 7.5 ± 1.7         | 0.25 ± 0.15              |
| Heart (myocard)         | 0.59 ± 0.11         | 13.2 ± 3.1        | 0.27 ± 0.03              |
| Lung                    | 4.47 ± 1.12         | 1.8 ± 0.6         | 0.98 ± 0.25              |
| Liver                   | 0.73 ± 0.11         | 10.5 ± 2.2        | 0.59 ± 0.08              |
| Spleen                  | 3.91 ± 0.91         | 2.0 ± 0.5         | 1.14 ± 0.13              |
| Pancreas                | 0.27 ± 0.04         | 28.5 ± 4.2        | 0.10 ± 0.03              |
| Stomach (empty)         | 6.24 ± 1.24         | 1.2 ± 0.2         | 0.37 ± 0.09              |
| Small intestine (empty) | 2.72 ± 1.15         | 3.1 ± 1.1         | 0.25 ± 0.06              |
| Large intestine (empty) | 4.36 ± 0.77         | 1.8 ± 0.5         | 0.35 ± 0.08              |
| Kidneys                 | 95.73 ± 12.59       | 0.1 ± 0.0         | 80.45 ± 17.63            |
| Adrenals                | 0.50 ± 0.11         | 15.9 ± 4.3        | 0.37 ± 0.13              |
| Muscle                  | 0.68 ± 0.18         | 11.4 ± 2.6        | 0.07 ± 0.02              |
| Tumor H2009             | 7.52 ± 1.21         |                   | 0.69 ± 0.17              |

## 5. Kinetic data

**Table S11:** Kinetic data for  $^{68}\text{Ga-YO}$ , derived from ROI analysis of 90 min dynamic PET scans ( $n = 3$ ).

| Time (min) | Blood        | Muscle      | Tumor       |
|------------|--------------|-------------|-------------|
| 0.0        | 0.01 ± 0.00  | 0.01 ± 0.00 | 0.01 ± 0.00 |
| 0.1        | 2.15 ± 1.38  | 0.01 ± 0.00 | 0.15 ± 0.19 |
| 0.2        | 5.88 ± 1.38  | 0.01 ± 0.00 | 0.68 ± 0.17 |
| 0.3        | 9.89 ± 2.02  | 0.01 ± 0.00 | 1.26 ± 0.47 |
| 0.4        | 16.32 ± 5.17 | 0.09 ± 0.07 | 1.99 ± 0.90 |
| 0.5        | 21.40 ± 8.11 | 0.51 ± 0.19 | 2.48 ± 1.32 |
| 0.6        | 23.76 ± 6.69 | 0.62 ± 0.25 | 2.75 ± 1.16 |
| 0.8        | 25.90 ± 1.75 | 0.81 ± 0.08 | 3.23 ± 1.02 |
| 0.9        | 24.58 ± 0.88 | 1.01 ± 0.39 | 3.32 ± 1.08 |
| 1.1        | 23.49 ± 1.06 | 1.17 ± 0.31 | 3.44 ± 1.15 |
| 1.3        | 23.00 ± 1.03 | 1.23 ± 0.24 | 3.46 ± 1.12 |
| 1.4        | 22.50 ± 1.06 | 1.36 ± 0.24 | 3.51 ± 1.19 |
| 1.6        | 22.05 ± 1.16 | 1.34 ± 0.23 | 3.59 ± 1.31 |
| 1.8        | 21.75 ± 1.34 | 1.42 ± 0.15 | 3.62 ± 1.08 |
| 1.9        | 21.36 ± 1.34 | 1.25 ± 0.16 | 3.61 ± 1.09 |
| 2.1        | 21.04 ± 1.42 | 1.57 ± 0.11 | 3.53 ± 1.08 |
| 2.3        | 20.81 ± 1.51 | 1.25 ± 0.06 | 3.70 ± 1.21 |
| 2.4        | 20.58 ± 1.55 | 1.36 ± 0.19 | 3.70 ± 1.22 |
| 2.6        | 20.38 ± 1.59 | 1.06 ± 0.19 | 3.74 ± 1.23 |
| 2.8        | 20.08 ± 1.58 | 1.43 ± 0.08 | 3.81 ± 1.10 |
| 2.9        | 19.92 ± 1.67 | 1.13 ± 0.23 | 3.81 ± 1.20 |
| 3.1        | 19.69 ± 1.44 | 1.41 ± 0.10 | 3.86 ± 1.28 |
| 3.3        | 19.56 ± 1.63 | 1.31 ± 0.26 | 3.82 ± 1.24 |
| 3.4        | 19.55 ± 1.65 | 1.37 ± 0.18 | 3.96 ± 1.27 |
| 3.6        | 19.30 ± 1.81 | 1.50 ± 0.02 | 3.96 ± 1.26 |
| 3.8        | 19.17 ± 1.78 | 1.54 ± 0.12 | 4.07 ± 1.17 |
| 3.9        | 19.03 ± 1.84 | 1.18 ± 0.06 | 4.08 ± 1.36 |
| 5.0        | 18.14 ± 2.04 | 1.47 ± 0.10 | 4.29 ± 1.29 |
| 7.0        | 16.72 ± 2.33 | 1.47 ± 0.11 | 4.64 ± 1.39 |
| 9.0        | 15.63 ± 2.41 | 1.55 ± 0.12 | 4.95 ± 1.53 |
| 11.0       | 14.73 ± 2.45 | 1.54 ± 0.13 | 5.21 ± 1.54 |
| 13.0       | 13.97 ± 2.38 | 1.55 ± 0.16 | 5.44 ± 1.56 |
| 15.0       | 13.32 ± 2.34 | 1.65 ± 0.23 | 5.62 ± 1.62 |
| 17.0       | 12.82 ± 2.24 | 1.65 ± 0.17 | 5.79 ± 1.62 |
| 19.0       | 12.39 ± 2.23 | 1.63 ± 0.18 | 5.96 ± 1.60 |
| 22.5       | 11.85 ± 2.11 | 1.68 ± 0.19 | 6.18 ± 1.62 |
| 27.5       | 11.16 ± 2.00 | 1.68 ± 0.21 | 6.45 ± 1.60 |
| 32.5       | 10.64 ± 1.89 | 1.70 ± 0.25 | 6.66 ± 1.53 |
| 37.5       | 10.21 ± 1.80 | 1.69 ± 0.20 | 6.80 ± 1.52 |
| 42.5       | 9.88 ± 1.75  | 1.71 ± 0.20 | 6.92 ± 1.47 |
| 47.5       | 9.63 ± 1.74  | 1.73 ± 0.19 | 7.01 ± 1.46 |
| 52.5       | 9.34 ± 1.71  | 1.71 ± 0.19 | 7.13 ± 1.36 |
| 57.5       | 9.07 ± 1.68  | 1.72 ± 0.14 | 7.20 ± 1.30 |
| 65.0       | 8.72 ± 1.62  | 1.69 ± 0.17 | 7.28 ± 1.25 |
| 75.0       | 8.29 ± 1.62  | 1.68 ± 0.16 | 7.38 ± 1.10 |
| 85.0       | 7.93 ± 1.58  | 1.67 ± 0.17 | 7.45 ± 1.03 |

**Table S12:** Kinetic data for <sup>68</sup>Ga-Y1Y, derived from ROI analysis of 90 min dynamic PET scans (n = 4).

| Time (min) | Blood         | Muscle      | Tumor       |
|------------|---------------|-------------|-------------|
| 0.0        | 0.00 ± 0.00   | 0.00 ± 0.00 | 0.00 ± 0.00 |
| 0.1        | 2.64 ± 2.62   | 0.00 ± 0.00 | 0.13 ± 0.23 |
| 0.2        | 11.28 ± 7.21  | 0.00 ± 0.00 | 0.87 ± 0.89 |
| 0.3        | 17.71 ± 9.52  | 0.00 ± 0.00 | 1.66 ± 1.34 |
| 0.4        | 24.35 ± 12.49 | 0.00 ± 0.00 | 2.35 ± 1.70 |
| 0.5        | 24.10 ± 8.21  | 0.05 ± 0.09 | 2.58 ± 1.40 |
| 0.6        | 23.33 ± 5.72  | 0.82 ± 0.15 | 2.54 ± 1.20 |
| 0.8        | 24.09 ± 3.75  | 0.91 ± 0.28 | 2.77 ± 1.11 |
| 0.9        | 22.88 ± 2.77  | 1.13 ± 0.26 | 2.89 ± 1.05 |
| 1.1        | 21.71 ± 2.45  | 1.15 ± 0.25 | 3.03 ± 1.00 |
| 1.3        | 23.25 ± 2.43  | 1.21 ± 0.14 | 3.20 ± 0.82 |
| 1.4        | 22.69 ± 2.49  | 1.31 ± 0.14 | 3.29 ± 0.74 |
| 1.6        | 21.86 ± 1.75  | 1.44 ± 0.15 | 3.37 ± 0.76 |
| 1.8        | 21.37 ± 1.57  | 1.39 ± 0.26 | 3.40 ± 0.75 |
| 1.9        | 21.10 ± 1.57  | 1.43 ± 0.11 | 3.47 ± 0.71 |
| 2.1        | 20.81 ± 1.65  | 1.44 ± 0.08 | 3.58 ± 0.76 |
| 2.3        | 20.41 ± 1.52  | 1.46 ± 0.12 | 3.58 ± 0.67 |
| 2.4        | 20.39 ± 1.72  | 1.43 ± 0.11 | 3.60 ± 0.69 |
| 2.6        | 20.12 ± 1.53  | 1.48 ± 0.15 | 3.67 ± 0.65 |
| 2.8        | 19.95 ± 1.39  | 1.40 ± 0.17 | 3.67 ± 0.63 |
| 2.9        | 19.66 ± 1.57  | 1.35 ± 0.10 | 3.75 ± 0.58 |
| 3.1        | 19.51 ± 1.51  | 1.38 ± 0.20 | 3.81 ± 0.59 |
| 3.3        | 19.37 ± 1.65  | 1.51 ± 0.09 | 3.80 ± 0.67 |
| 3.4        | 19.05 ± 1.62  | 1.60 ± 0.16 | 3.88 ± 0.53 |
| 3.6        | 18.87 ± 1.66  | 1.56 ± 0.11 | 3.82 ± 0.61 |
| 3.8        | 18.95 ± 1.92  | 1.54 ± 0.05 | 3.94 ± 0.53 |
| 3.9        | 18.56 ± 1.47  | 1.51 ± 0.16 | 3.98 ± 0.48 |
| 5.0        | 17.59 ± 1.69  | 1.43 ± 0.15 | 4.17 ± 0.43 |
| 7.0        | 15.92 ± 1.72  | 1.47 ± 0.14 | 4.54 ± 0.32 |
| 9.0        | 14.60 ± 1.72  | 1.55 ± 0.16 | 4.84 ± 0.26 |
| 11.0       | 13.53 ± 1.56  | 1.56 ± 0.16 | 5.04 ± 0.23 |
| 13.0       | 12.65 ± 1.46  | 1.59 ± 0.15 | 5.27 ± 0.21 |
| 15.0       | 11.88 ± 1.51  | 1.60 ± 0.14 | 5.40 ± 0.22 |
| 17.0       | 11.26 ± 1.55  | 1.61 ± 0.14 | 5.56 ± 0.23 |
| 19.0       | 10.72 ± 1.59  | 1.60 ± 0.11 | 5.70 ± 0.22 |
| 22.5       | 9.90 ± 1.50   | 1.60 ± 0.10 | 5.85 ± 0.19 |
| 27.5       | 8.92 ± 1.45   | 1.59 ± 0.10 | 6.05 ± 0.19 |
| 32.5       | 8.26 ± 1.37   | 1.60 ± 0.08 | 6.18 ± 0.20 |
| 37.5       | 7.76 ± 1.28   | 1.59 ± 0.06 | 6.25 ± 0.21 |
| 42.5       | 7.37 ± 1.20   | 1.58 ± 0.06 | 6.33 ± 0.24 |
| 47.5       | 7.08 ± 1.18   | 1.54 ± 0.05 | 6.36 ± 0.25 |
| 52.5       | 6.80 ± 1.11   | 1.52 ± 0.04 | 6.41 ± 0.27 |
| 57.5       | 6.53 ± 1.03   | 1.52 ± 0.07 | 6.43 ± 0.30 |
| 65.0       | 6.18 ± 0.98   | 1.47 ± 0.06 | 6.45 ± 0.32 |
| 75.0       | 5.74 ± 0.87   | 1.43 ± 0.07 | 6.49 ± 0.37 |
| 85.0       | 5.45 ± 0.81   | 1.41 ± 0.09 | 6.52 ± 0.42 |

**Table S13:** Kinetic data for  $^{68}\text{Ga}$ -Y1F, derived from ROI analysis of 90 min dynamic PET scans (n = 2).

| Time (min) | Blood        | Muscle      | Tumor       |
|------------|--------------|-------------|-------------|
| 0.0        | 0.99 ± 1.41  | 0.00 ± 0.00 | 0.00 ± 0.00 |
| 0.1        | 11.30 ± 5.10 | 0.00 ± 0.00 | 0.35 ± 0.49 |
| 0.2        | 18.40 ± 4.37 | 0.03 ± 0.05 | 0.73 ± 1.03 |
| 0.3        | 21.84 ± 8.22 | 0.17 ± 0.29 | 0.91 ± 1.29 |
| 0.4        | 19.27 ± 8.57 | 0.31 ± 0.54 | 1.19 ± 0.86 |
| 0.5        | 17.66 ± 7.93 | 0.34 ± 0.59 | 1.93 ± 0.16 |
| 0.6        | 22.31 ± 4.99 | 0.55 ± 0.41 | 2.11 ± 0.08 |
| 0.8        | 24.88 ± 1.69 | 0.59 ± 0.54 | 2.27 ± 0.02 |
| 0.9        | 23.21 ± 0.58 | 0.73 ± 0.63 | 2.20 ± 0.17 |
| 1.1        | 20.72 ± 2.42 | 0.66 ± 0.57 | 2.27 ± 0.19 |
| 1.3        | 20.92 ± 1.47 | 0.75 ± 0.66 | 2.29 ± 0.18 |
| 1.4        | 20.67 ± 1.62 | 0.82 ± 0.48 | 2.17 ± 0.42 |
| 1.6        | 20.11 ± 1.34 | 0.92 ± 0.37 | 2.36 ± 0.16 |
| 1.8        | 19.56 ± 1.48 | 1.03 ± 0.22 | 2.46 ± 0.36 |
| 1.9        | 19.36 ± 1.43 | 1.18 ± 0.16 | 2.40 ± 0.23 |
| 2.1        | 18.91 ± 1.27 | 1.19 ± 0.08 | 2.50 ± 0.35 |
| 2.3        | 18.69 ± 1.28 | 1.33 ± 0.09 | 2.49 ± 0.13 |
| 2.4        | 18.54 ± 1.35 | 1.23 ± 0.10 | 2.54 ± 0.42 |
| 2.6        | 18.29 ± 1.43 | 1.36 ± 0.20 | 2.65 ± 0.23 |
| 2.8        | 18.04 ± 1.39 | 1.30 ± 0.14 | 2.52 ± 0.37 |
| 2.9        | 17.81 ± 0.99 | 1.31 ± 0.13 | 2.74 ± 0.23 |
| 3.1        | 17.74 ± 1.28 | 1.44 ± 0.12 | 2.93 ± 0.11 |
| 3.3        | 17.31 ± 1.22 | 1.38 ± 0.22 | 2.82 ± 0.18 |
| 3.4        | 17.07 ± 1.20 | 1.37 ± 0.22 | 2.98 ± 0.24 |
| 3.6        | 16.89 ± 1.20 | 1.49 ± 0.12 | 2.88 ± 0.02 |
| 3.8        | 16.66 ± 1.35 | 1.41 ± 0.14 | 3.08 ± 0.14 |
| 3.9        | 16.61 ± 1.35 | 1.47 ± 0.29 | 2.97 ± 0.06 |
| 5.0        | 15.58 ± 1.52 | 1.41 ± 0.19 | 3.35 ± 0.05 |
| 7.0        | 13.91 ± 1.59 | 1.51 ± 0.17 | 3.74 ± 0.08 |
| 9.0        | 12.47 ± 1.40 | 1.49 ± 0.19 | 4.09 ± 0.10 |
| 11.0       | 11.25 ± 0.99 | 1.51 ± 0.17 | 4.37 ± 0.07 |
| 13.0       | 10.31 ± 0.73 | 1.55 ± 0.15 | 4.61 ± 0.02 |
| 15.0       | 9.70 ± 0.57  | 1.58 ± 0.19 | 4.78 ± 0.00 |
| 17.0       | 9.24 ± 0.42  | 1.57 ± 0.18 | 4.96 ± 0.06 |
| 19.0       | 8.85 ± 0.19  | 1.60 ± 0.17 | 5.09 ± 0.03 |
| 22.5       | 8.42 ± 0.05  | 1.59 ± 0.21 | 5.23 ± 0.11 |
| 27.5       | 7.87 ± 0.24  | 1.59 ± 0.20 | 5.46 ± 0.07 |
| 32.5       | 7.49 ± 0.37  | 1.57 ± 0.22 | 5.62 ± 0.09 |
| 37.5       | 7.19 ± 0.48  | 1.58 ± 0.20 | 5.78 ± 0.11 |
| 42.5       | 6.95 ± 0.48  | 1.57 ± 0.25 | 5.86 ± 0.09 |
| 47.5       | 6.71 ± 0.47  | 1.58 ± 0.20 | 5.97 ± 0.14 |
| 52.5       | 6.50 ± 0.38  | 1.55 ± 0.24 | 6.03 ± 0.12 |
| 57.5       | 6.38 ± 0.38  | 1.54 ± 0.20 | 6.05 ± 0.11 |
| 65.0       | 6.20 ± 0.36  | 1.52 ± 0.24 | 6.16 ± 0.07 |
| 75.0       | 5.94 ± 0.33  | 1.51 ± 0.24 | 6.24 ± 0.06 |
| 85.0       | 5.71 ± 0.31  | 1.47 ± 0.22 | 6.35 ± 0.05 |

**Table S14:** Kinetic data for  $^{68}\text{Ga}$ -Y2, derived from ROI analysis of 90 min dynamic PET scans (n = 3).

| Time (min) | Blood         | Muscle      | Tumor       |
|------------|---------------|-------------|-------------|
| 0.0        | 0.75 ± 1.28   | 0.00 ± 0.00 | 0.00 ± 0.00 |
| 0.1        | 6.94 ± 7.46   | 0.00 ± 0.00 | 0.11 ± 0.09 |
| 0.2        | 19.50 ± 10.00 | 0.00 ± 0.00 | 0.89 ± 0.49 |
| 0.3        | 27.64 ± 8.30  | 0.01 ± 0.01 | 1.66 ± 0.53 |
| 0.4        | 30.18 ± 1.67  | 0.26 ± 0.42 | 2.37 ± 0.50 |
| 0.5        | 28.66 ± 2.23  | 0.58 ± 0.58 | 2.83 ± 0.40 |
| 0.6        | 24.65 ± 0.43  | 0.95 ± 0.20 | 2.95 ± 0.86 |
| 0.8        | 22.29 ± 1.32  | 1.21 ± 0.06 | 3.16 ± 1.06 |
| 0.9        | 21.50 ± 1.21  | 1.44 ± 0.09 | 3.41 ± 0.99 |
| 1.1        | 20.61 ± 0.90  | 1.33 ± 0.06 | 3.52 ± 0.76 |
| 1.3        | 20.30 ± 1.16  | 1.46 ± 0.25 | 3.51 ± 0.79 |
| 1.4        | 19.74 ± 0.67  | 1.43 ± 0.20 | 3.60 ± 0.82 |
| 1.6        | 19.02 ± 1.14  | 1.24 ± 0.14 | 3.62 ± 0.74 |
| 1.8        | 18.98 ± 0.96  | 1.46 ± 0.07 | 3.69 ± 0.85 |
| 1.9        | 18.48 ± 0.84  | 1.53 ± 0.15 | 3.82 ± 0.80 |
| 2.1        | 18.41 ± 0.96  | 1.67 ± 0.25 | 3.88 ± 0.75 |
| 2.3        | 17.83 ± 0.69  | 1.58 ± 0.32 | 3.86 ± 0.82 |
| 2.4        | 17.59 ± 0.71  | 1.54 ± 0.14 | 4.08 ± 0.63 |
| 2.6        | 17.29 ± 0.72  | 1.49 ± 0.19 | 4.03 ± 0.79 |
| 2.8        | 16.94 ± 0.73  | 1.72 ± 0.11 | 4.03 ± 0.70 |
| 2.9        | 16.67 ± 0.49  | 1.63 ± 0.09 | 4.10 ± 0.69 |
| 3.1        | 16.46 ± 0.56  | 1.72 ± 0.12 | 4.14 ± 0.78 |
| 3.3        | 16.32 ± 0.39  | 1.72 ± 0.34 | 4.26 ± 0.67 |
| 3.4        | 15.95 ± 0.32  | 1.72 ± 0.03 | 4.24 ± 0.76 |
| 3.6        | 15.88 ± 0.28  | 1.81 ± 0.16 | 4.36 ± 0.75 |
| 3.8        | 15.65 ± 0.27  | 1.69 ± 0.03 | 4.36 ± 0.66 |
| 3.9        | 15.27 ± 0.16  | 1.82 ± 0.34 | 4.53 ± 0.52 |
| 5.0        | 14.17 ± 0.22  | 1.68 ± 0.13 | 4.62 ± 0.64 |
| 7.0        | 12.45 ± 0.51  | 1.71 ± 0.15 | 4.88 ± 0.57 |
| 9.0        | 11.30 ± 0.68  | 1.74 ± 0.16 | 5.09 ± 0.54 |
| 11.0       | 10.48 ± 0.75  | 1.73 ± 0.20 | 5.23 ± 0.52 |
| 13.0       | 9.85 ± 0.79   | 1.71 ± 0.20 | 5.30 ± 0.53 |
| 15.0       | 9.34 ± 0.81   | 1.68 ± 0.15 | 5.35 ± 0.54 |
| 17.0       | 8.95 ± 0.81   | 1.65 ± 0.14 | 5.44 ± 0.52 |
| 19.0       | 8.59 ± 0.86   | 1.65 ± 0.14 | 5.44 ± 0.58 |
| 22.5       | 8.16 ± 0.84   | 1.64 ± 0.17 | 5.46 ± 0.59 |
| 27.5       | 7.70 ± 0.87   | 1.61 ± 0.16 | 5.50 ± 0.61 |
| 32.5       | 7.26 ± 0.87   | 1.57 ± 0.17 | 5.48 ± 0.65 |
| 37.5       | 6.92 ± 0.84   | 1.54 ± 0.15 | 5.48 ± 0.65 |
| 42.5       | 6.62 ± 0.82   | 1.49 ± 0.17 | 5.47 ± 0.67 |
| 47.5       | 6.33 ± 0.80   | 1.49 ± 0.18 | 5.47 ± 0.70 |
| 52.5       | 6.09 ± 0.81   | 1.44 ± 0.15 | 5.43 ± 0.70 |
| 57.5       | 5.83 ± 0.80   | 1.42 ± 0.14 | 5.44 ± 0.69 |
| 65.0       | 5.51 ± 0.81   | 1.38 ± 0.16 | 5.45 ± 0.69 |
| 75.0       | 5.13 ± 0.86   | 1.34 ± 0.16 | 5.41 ± 0.67 |
| 85.0       | 4.80 ± 0.84   | 1.30 ± 0.17 | 5.40 ± 0.66 |

**Table S15:** Kinetic data for  $^{68}\text{Ga}$ -Y2Y, derived from ROI analysis of 90 min dynamic PET scans (n = 3).

| Time (min) | Blood        | Muscle      | Tumor       |
|------------|--------------|-------------|-------------|
| 0.0        | 0.00 ± 0.00  | 0.00 ± 0.00 | 0.00 ± 0.00 |
| 0.1        | 3.95 ± 1.48  | 0.00 ± 0.00 | 0.12 ± 0.12 |
| 0.2        | 12.14 ± 0.76 | 0.00 ± 0.00 | 0.81 ± 0.13 |
| 0.3        | 18.86 ± 0.49 | 0.11 ± 0.18 | 1.65 ± 0.26 |
| 0.4        | 24.31 ± 3.17 | 0.18 ± 0.29 | 2.40 ± 0.57 |
| 0.5        | 24.43 ± 6.95 | 0.61 ± 0.34 | 2.73 ± 0.89 |
| 0.6        | 20.59 ± 4.39 | 1.09 ± 0.26 | 2.65 ± 0.84 |
| 0.8        | 19.62 ± 3.96 | 1.18 ± 0.31 | 2.90 ± 0.96 |
| 0.9        | 19.12 ± 3.65 | 1.21 ± 0.23 | 2.93 ± 0.89 |
| 1.1        | 18.76 ± 3.55 | 1.27 ± 0.31 | 3.03 ± 0.90 |
| 1.3        | 18.14 ± 3.49 | 1.43 ± 0.42 | 3.11 ± 0.91 |
| 1.4        | 17.95 ± 3.53 | 1.37 ± 0.41 | 3.15 ± 0.89 |
| 1.6        | 17.48 ± 3.42 | 1.39 ± 0.28 | 3.23 ± 0.92 |
| 1.8        | 17.34 ± 3.31 | 1.30 ± 0.31 | 3.33 ± 0.88 |
| 1.9        | 16.86 ± 3.40 | 1.37 ± 0.33 | 3.38 ± 0.89 |
| 2.1        | 16.69 ± 3.33 | 1.46 ± 0.32 | 3.40 ± 0.94 |
| 2.3        | 16.43 ± 3.26 | 1.38 ± 0.40 | 3.45 ± 0.89 |
| 2.4        | 16.34 ± 3.32 | 1.51 ± 0.26 | 3.47 ± 0.90 |
| 2.6        | 16.09 ± 3.32 | 1.43 ± 0.34 | 3.52 ± 0.87 |
| 2.8        | 15.78 ± 3.08 | 1.37 ± 0.36 | 3.60 ± 0.89 |
| 2.9        | 15.67 ± 3.34 | 1.61 ± 0.41 | 3.66 ± 0.87 |
| 3.1        | 15.42 ± 3.24 | 1.39 ± 0.22 | 3.74 ± 0.90 |
| 3.3        | 15.35 ± 3.23 | 1.49 ± 0.53 | 3.77 ± 0.90 |
| 3.4        | 15.11 ± 3.22 | 1.47 ± 0.28 | 3.77 ± 0.89 |
| 3.6        | 14.84 ± 3.21 | 1.40 ± 0.39 | 3.83 ± 0.94 |
| 3.8        | 14.82 ± 3.35 | 1.56 ± 0.46 | 3.87 ± 0.90 |
| 3.9        | 14.64 ± 3.04 | 1.53 ± 0.33 | 3.93 ± 0.90 |
| 5.0        | 13.69 ± 3.02 | 1.52 ± 0.33 | 4.14 ± 0.91 |
| 7.0        | 12.37 ± 2.81 | 1.59 ± 0.38 | 4.52 ± 0.96 |
| 9.0        | 11.31 ± 2.64 | 1.62 ± 0.41 | 4.79 ± 1.01 |
| 11.0       | 10.42 ± 2.48 | 1.63 ± 0.41 | 5.00 ± 1.04 |
| 13.0       | 9.73 ± 2.44  | 1.65 ± 0.45 | 5.19 ± 1.07 |
| 15.0       | 9.10 ± 2.33  | 1.63 ± 0.43 | 5.34 ± 1.11 |
| 17.0       | 8.53 ± 2.26  | 1.65 ± 0.47 | 5.47 ± 1.19 |
| 19.0       | 8.09 ± 2.17  | 1.65 ± 0.46 | 5.56 ± 1.21 |
| 22.5       | 7.47 ± 2.03  | 1.63 ± 0.46 | 5.74 ± 1.29 |
| 27.5       | 6.77 ± 1.88  | 1.62 ± 0.49 | 5.90 ± 1.36 |
| 32.5       | 6.24 ± 1.75  | 1.58 ± 0.53 | 6.01 ± 1.41 |
| 37.5       | 5.82 ± 1.65  | 1.57 ± 0.52 | 6.10 ± 1.44 |
| 42.5       | 5.54 ± 1.61  | 1.55 ± 0.53 | 6.18 ± 1.50 |
| 47.5       | 5.31 ± 1.60  | 1.54 ± 0.52 | 6.23 ± 1.52 |
| 52.5       | 5.10 ± 1.58  | 1.52 ± 0.51 | 6.26 ± 1.53 |
| 57.5       | 4.89 ± 1.50  | 1.47 ± 0.49 | 6.29 ± 1.55 |
| 65.0       | 4.54 ± 1.35  | 1.44 ± 0.50 | 6.35 ± 1.62 |
| 75.0       | 4.16 ± 1.22  | 1.40 ± 0.49 | 6.38 ± 1.66 |
| 85.0       | 3.94 ± 1.19  | 1.37 ± 0.51 | 6.39 ± 1.70 |

**Table S16:** Kinetic data for <sup>68</sup>Ga-Y2F, derived from ROI analysis of 90 min dynamic PET scans (n = 3).

| Time (min) | Blood        | Muscle      | Tumor       |
|------------|--------------|-------------|-------------|
| 0.0        | 0.00 ± 0.00  | 0.00 ± 0.00 | 0.00 ± 0.00 |
| 0.1        | 4.42 ± 0.92  | 0.00 ± 0.00 | 0.13 ± 0.16 |
| 0.2        | 15.31 ± 0.79 | 0.00 ± 0.00 | 1.08 ± 0.43 |
| 0.3        | 25.08 ± 0.69 | 0.00 ± 0.00 | 2.04 ± 0.41 |
| 0.4        | 27.51 ± 2.57 | 0.15 ± 0.14 | 2.37 ± 0.22 |
| 0.5        | 25.75 ± 1.66 | 0.32 ± 0.42 | 2.68 ± 0.09 |
| 0.6        | 24.07 ± 2.09 | 1.04 ± 0.20 | 2.61 ± 0.24 |
| 0.8        | 22.36 ± 1.75 | 1.11 ± 0.17 | 2.55 ± 0.36 |
| 0.9        | 21.49 ± 1.36 | 1.30 ± 0.29 | 2.66 ± 0.35 |
| 1.1        | 20.30 ± 0.91 | 1.43 ± 0.24 | 2.82 ± 0.33 |
| 1.3        | 19.58 ± 0.87 | 1.43 ± 0.25 | 2.90 ± 0.31 |
| 1.4        | 19.23 ± 1.07 | 1.40 ± 0.30 | 3.00 ± 0.31 |
| 1.6        | 18.49 ± 0.98 | 1.44 ± 0.19 | 3.05 ± 0.44 |
| 1.8        | 18.11 ± 0.95 | 1.47 ± 0.28 | 3.07 ± 0.24 |
| 1.9        | 17.41 ± 0.89 | 1.46 ± 0.16 | 3.23 ± 0.39 |
| 2.1        | 17.15 ± 1.03 | 1.51 ± 0.22 | 3.31 ± 0.36 |
| 2.3        | 16.96 ± 1.13 | 1.54 ± 0.27 | 3.32 ± 0.44 |
| 2.4        | 16.51 ± 1.25 | 1.57 ± 0.08 | 3.43 ± 0.31 |
| 2.6        | 16.15 ± 1.25 | 1.79 ± 0.31 | 3.50 ± 0.26 |
| 2.8        | 15.96 ± 1.21 | 1.68 ± 0.54 | 3.61 ± 0.46 |
| 2.9        | 15.60 ± 1.33 | 1.55 ± 0.25 | 3.63 ± 0.31 |
| 3.1        | 15.36 ± 1.50 | 1.60 ± 0.15 | 3.63 ± 0.41 |
| 3.3        | 14.93 ± 1.43 | 1.76 ± 0.27 | 3.64 ± 0.34 |
| 3.4        | 14.83 ± 1.48 | 1.52 ± 0.17 | 3.86 ± 0.38 |
| 3.6        | 14.51 ± 1.53 | 1.71 ± 0.27 | 3.74 ± 0.46 |
| 3.8        | 14.22 ± 1.58 | 1.65 ± 0.33 | 3.89 ± 0.40 |
| 3.9        | 14.08 ± 1.43 | 1.59 ± 0.18 | 3.99 ± 0.39 |
| 5.0        | 12.61 ± 1.82 | 1.56 ± 0.02 | 4.22 ± 0.39 |
| 7.0        | 10.80 ± 2.03 | 1.62 ± 0.03 | 4.61 ± 0.44 |
| 9.0        | 9.63 ± 2.01  | 1.63 ± 0.05 | 4.91 ± 0.49 |
| 11.0       | 8.84 ± 2.02  | 1.63 ± 0.04 | 5.12 ± 0.48 |
| 13.0       | 8.26 ± 1.93  | 1.57 ± 0.02 | 5.30 ± 0.54 |
| 15.0       | 7.71 ± 1.77  | 1.61 ± 0.05 | 5.39 ± 0.61 |
| 17.0       | 7.26 ± 1.56  | 1.58 ± 0.02 | 5.52 ± 0.62 |
| 19.0       | 6.83 ± 1.34  | 1.56 ± 0.06 | 5.60 ± 0.65 |
| 22.5       | 6.28 ± 1.05  | 1.54 ± 0.04 | 5.74 ± 0.73 |
| 27.5       | 5.72 ± 0.68  | 1.48 ± 0.06 | 5.85 ± 0.79 |
| 32.5       | 5.44 ± 0.42  | 1.47 ± 0.07 | 5.93 ± 0.80 |
| 37.5       | 5.11 ± 0.29  | 1.43 ± 0.09 | 5.96 ± 0.87 |
| 42.5       | 4.90 ± 0.21  | 1.38 ± 0.08 | 5.99 ± 0.86 |
| 47.5       | 4.70 ± 0.17  | 1.36 ± 0.10 | 6.04 ± 0.88 |
| 52.5       | 4.46 ± 0.10  | 1.34 ± 0.10 | 6.05 ± 0.89 |
| 57.5       | 4.27 ± 0.14  | 1.29 ± 0.08 | 6.09 ± 0.91 |
| 65.0       | 3.99 ± 0.16  | 1.25 ± 0.09 | 6.12 ± 0.91 |
| 75.0       | 3.69 ± 0.20  | 1.18 ± 0.10 | 6.12 ± 0.98 |
| 85.0       | 3.48 ± 0.18  | 1.13 ± 0.09 | 6.10 ± 1.00 |



**Table S17:** Kinetic data for  $^{68}\text{Ga}$ -**Y3Y**, derived from ROI analysis of 90 min dynamic PET scans (n = 3).

| Time (min) | Blood         | Muscle      | Tumor       |
|------------|---------------|-------------|-------------|
| 0.0        | 0.00 ± 0.00   | 0.00 ± 0.00 | 0.00 ± 0.00 |
| 0.1        | 4.00 ± 3.37   | 0.00 ± 0.00 | 0.09 ± 0.15 |
| 0.2        | 12.05 ± 8.54  | 0.00 ± 0.00 | 0.50 ± 0.64 |
| 0.3        | 17.19 ± 10.42 | 0.00 ± 0.00 | 0.88 ± 0.97 |
| 0.4        | 20.19 ± 7.27  | 0.00 ± 0.00 | 1.11 ± 0.93 |
| 0.5        | 23.10 ± 3.56  | 0.00 ± 0.00 | 1.33 ± 0.77 |
| 0.6        | 21.19 ± 3.30  | 0.76 ± 0.14 | 1.42 ± 0.67 |
| 0.8        | 19.10 ± 1.93  | 0.90 ± 0.30 | 1.58 ± 0.70 |
| 0.9        | 20.22 ± 5.07  | 1.00 ± 0.22 | 1.73 ± 0.69 |
| 1.1        | 19.00 ± 4.17  | 1.08 ± 0.15 | 1.80 ± 0.58 |
| 1.3        | 17.50 ± 3.37  | 1.19 ± 0.17 | 1.88 ± 0.64 |
| 1.4        | 16.18 ± 2.29  | 1.24 ± 0.30 | 1.99 ± 0.68 |
| 1.6        | 15.36 ± 1.85  | 1.28 ± 0.20 | 2.10 ± 0.68 |
| 1.8        | 14.87 ± 1.74  | 1.29 ± 0.13 | 2.18 ± 0.64 |
| 1.9        | 14.39 ± 1.56  | 1.45 ± 0.20 | 2.26 ± 0.63 |
| 2.1        | 13.96 ± 1.51  | 1.49 ± 0.05 | 2.38 ± 0.63 |
| 2.3        | 13.45 ± 1.55  | 1.45 ± 0.14 | 2.39 ± 0.55 |
| 2.4        | 13.08 ± 1.24  | 1.41 ± 0.27 | 2.52 ± 0.53 |
| 2.6        | 12.62 ± 1.51  | 1.57 ± 0.19 | 2.56 ± 0.51 |
| 2.8        | 12.21 ± 1.39  | 1.62 ± 0.15 | 2.64 ± 0.44 |
| 2.9        | 11.94 ± 1.15  | 1.59 ± 0.20 | 2.70 ± 0.57 |
| 3.1        | 11.67 ± 1.30  | 1.60 ± 0.21 | 2.74 ± 0.49 |
| 3.3        | 11.42 ± 1.22  | 1.58 ± 0.31 | 2.77 ± 0.42 |
| 3.4        | 11.15 ± 1.21  | 1.60 ± 0.33 | 2.82 ± 0.43 |
| 3.6        | 10.93 ± 1.09  | 1.71 ± 0.13 | 2.94 ± 0.47 |
| 3.8        | 10.64 ± 1.18  | 1.60 ± 0.27 | 2.95 ± 0.38 |
| 3.9        | 10.55 ± 1.08  | 1.56 ± 0.18 | 3.06 ± 0.35 |
| 5.0        | 9.24 ± 1.09   | 1.61 ± 0.28 | 3.22 ± 0.34 |
| 7.0        | 7.65 ± 0.88   | 1.63 ± 0.24 | 3.51 ± 0.25 |
| 9.0        | 6.63 ± 0.83   | 1.63 ± 0.27 | 3.69 ± 0.22 |
| 11.0       | 5.93 ± 0.80   | 1.64 ± 0.27 | 3.81 ± 0.20 |
| 13.0       | 5.38 ± 0.75   | 1.59 ± 0.22 | 3.91 ± 0.19 |
| 15.0       | 4.96 ± 0.70   | 1.52 ± 0.24 | 3.96 ± 0.16 |
| 17.0       | 4.60 ± 0.70   | 1.53 ± 0.23 | 4.00 ± 0.17 |
| 19.0       | 4.30 ± 0.65   | 1.49 ± 0.18 | 4.02 ± 0.15 |
| 22.5       | 3.93 ± 0.62   | 1.44 ± 0.18 | 4.09 ± 0.14 |
| 27.5       | 3.49 ± 0.56   | 1.35 ± 0.17 | 4.11 ± 0.15 |
| 32.5       | 3.15 ± 0.51   | 1.29 ± 0.17 | 4.12 ± 0.14 |
| 37.5       | 2.89 ± 0.52   | 1.23 ± 0.17 | 4.11 ± 0.13 |
| 42.5       | 2.68 ± 0.47   | 1.16 ± 0.18 | 4.10 ± 0.14 |
| 47.5       | 2.49 ± 0.44   | 1.15 ± 0.14 | 4.10 ± 0.11 |
| 52.5       | 2.33 ± 0.46   | 1.10 ± 0.18 | 4.06 ± 0.14 |
| 57.5       | 2.16 ± 0.43   | 1.06 ± 0.15 | 4.05 ± 0.14 |
| 65.0       | 2.01 ± 0.40   | 0.99 ± 0.16 | 3.98 ± 0.18 |
| 75.0       | 1.82 ± 0.37   | 0.93 ± 0.17 | 3.91 ± 0.20 |
| 85.0       | 1.65 ± 0.34   | 0.89 ± 0.15 | 3.84 ± 0.24 |

**Table S18:** Kinetic data for  $^{68}\text{Ga}$ -Y3F, derived from ROI analysis of 90 min dynamic PET scans (n = 3).

| Time (min) | Blood        | Muscle      | Tumor       |
|------------|--------------|-------------|-------------|
| 0.0        | 0.85 ± 1.47  | 0.00 ± 0.00 | 0.00 ± 0.00 |
| 0.1        | 9.72 ± 5.35  | 0.00 ± 0.00 | 0.14 ± 0.16 |
| 0.2        | 18.84 ± 7.99 | 0.00 ± 0.00 | 0.64 ± 0.31 |
| 0.3        | 26.89 ± 7.33 | 0.01 ± 0.02 | 1.27 ± 0.20 |
| 0.4        | 29.52 ± 4.86 | 0.24 ± 0.42 | 1.71 ± 0.31 |
| 0.5        | 27.07 ± 3.36 | 0.46 ± 0.65 | 1.89 ± 0.52 |
| 0.6        | 21.14 ± 1.36 | 0.83 ± 0.10 | 1.84 ± 0.40 |
| 0.8        | 18.68 ± 0.81 | 1.16 ± 0.17 | 2.02 ± 0.42 |
| 0.9        | 17.58 ± 0.96 | 1.14 ± 0.06 | 2.18 ± 0.45 |
| 1.1        | 16.50 ± 1.08 | 1.23 ± 0.10 | 2.36 ± 0.40 |
| 1.3        | 15.68 ± 1.13 | 1.21 ± 0.17 | 2.47 ± 0.39 |
| 1.4        | 14.80 ± 1.05 | 1.59 ± 0.29 | 2.56 ± 0.34 |
| 1.6        | 14.22 ± 1.14 | 1.48 ± 0.65 | 2.65 ± 0.39 |
| 1.8        | 13.73 ± 1.07 | 1.57 ± 0.20 | 2.75 ± 0.43 |
| 1.9        | 13.28 ± 1.30 | 1.68 ± 0.32 | 2.85 ± 0.43 |
| 2.1        | 12.60 ± 1.28 | 1.49 ± 0.39 | 2.93 ± 0.38 |
| 2.3        | 12.14 ± 1.44 | 1.49 ± 0.28 | 3.03 ± 0.38 |
| 2.4        | 11.75 ± 1.30 | 1.50 ± 0.50 | 3.02 ± 0.34 |
| 2.6        | 11.58 ± 1.34 | 1.53 ± 0.23 | 3.27 ± 0.47 |
| 2.8        | 11.06 ± 1.25 | 1.41 ± 0.07 | 3.17 ± 0.38 |
| 2.9        | 10.74 ± 1.48 | 1.48 ± 0.10 | 3.26 ± 0.30 |
| 3.1        | 10.49 ± 1.25 | 1.51 ± 0.02 | 3.31 ± 0.29 |
| 3.3        | 10.20 ± 1.33 | 1.84 ± 0.35 | 3.37 ± 0.31 |
| 3.4        | 9.91 ± 1.32  | 1.61 ± 0.33 | 3.52 ± 0.39 |
| 3.6        | 9.68 ± 1.34  | 1.57 ± 0.49 | 3.48 ± 0.33 |
| 3.8        | 9.46 ± 1.33  | 1.84 ± 0.17 | 3.51 ± 0.25 |
| 3.9        | 9.14 ± 1.27  | 1.64 ± 0.18 | 3.62 ± 0.31 |
| 5.0        | 7.93 ± 1.18  | 1.67 ± 0.16 | 3.73 ± 0.20 |
| 7.0        | 6.35 ± 0.96  | 1.72 ± 0.22 | 4.03 ± 0.10 |
| 9.0        | 5.38 ± 0.85  | 1.69 ± 0.19 | 4.17 ± 0.05 |
| 11.0       | 4.72 ± 0.75  | 1.62 ± 0.07 | 4.30 ± 0.08 |
| 13.0       | 4.24 ± 0.71  | 1.62 ± 0.09 | 4.33 ± 0.17 |
| 15.0       | 3.89 ± 0.66  | 1.67 ± 0.11 | 4.40 ± 0.17 |
| 17.0       | 3.59 ± 0.61  | 1.56 ± 0.01 | 4.44 ± 0.23 |
| 19.0       | 3.37 ± 0.50  | 1.51 ± 0.06 | 4.45 ± 0.24 |
| 22.5       | 3.01 ± 0.47  | 1.47 ± 0.04 | 4.48 ± 0.28 |
| 27.5       | 2.65 ± 0.39  | 1.42 ± 0.03 | 4.46 ± 0.34 |
| 32.5       | 2.37 ± 0.34  | 1.36 ± 0.10 | 4.46 ± 0.36 |
| 37.5       | 2.14 ± 0.32  | 1.28 ± 0.12 | 4.42 ± 0.39 |
| 42.5       | 1.97 ± 0.30  | 1.21 ± 0.14 | 4.39 ± 0.41 |
| 47.5       | 1.82 ± 0.28  | 1.23 ± 0.10 | 4.37 ± 0.41 |
| 52.5       | 1.71 ± 0.26  | 1.19 ± 0.09 | 4.32 ± 0.40 |
| 57.5       | 1.60 ± 0.24  | 1.12 ± 0.18 | 4.28 ± 0.44 |
| 65.0       | 1.45 ± 0.25  | 1.09 ± 0.14 | 4.21 ± 0.44 |
| 75.0       | 1.30 ± 0.22  | 1.04 ± 0.17 | 4.13 ± 0.44 |
| 85.0       | 1.19 ± 0.22  | 0.97 ± 0.18 | 4.03 ± 0.46 |

**Table S19:** Kinetic data for  $^{68}\text{Ga}$ -Y4, derived from ROI analysis of 90 min dynamic PET scans (n = 3).

| Time (min) | Blood        | Muscle      | Tumor       |
|------------|--------------|-------------|-------------|
| 0.0        | 0.00 ± 0.00  | 0.00 ± 0.00 | 0.00 ± 0.00 |
| 0.1        | 3.33 ± 1.82  | 0.00 ± 0.00 | 0.01 ± 0.02 |
| 0.2        | 18.09 ± 4.10 | 0.00 ± 0.00 | 0.97 ± 0.87 |
| 0.3        | 29.77 ± 6.66 | 0.00 ± 0.00 | 1.98 ± 1.35 |
| 0.4        | 34.25 ± 5.16 | 0.58 ± 0.24 | 2.61 ± 1.68 |
| 0.5        | 30.05 ± 3.71 | 1.15 ± 0.29 | 3.02 ± 1.71 |
| 0.6        | 25.44 ± 1.65 | 1.24 ± 0.25 | 3.06 ± 1.41 |
| 0.8        | 22.62 ± 0.89 | 1.48 ± 0.15 | 3.24 ± 1.50 |
| 0.9        | 21.13 ± 0.65 | 1.51 ± 0.25 | 3.25 ± 1.16 |
| 1.1        | 19.86 ± 1.10 | 1.55 ± 0.23 | 2.96 ± 0.39 |
| 1.3        | 18.77 ± 0.83 | 1.51 ± 0.16 | 3.16 ± 0.64 |
| 1.4        | 18.24 ± 1.26 | 1.64 ± 0.12 | 3.09 ± 0.40 |
| 1.6        | 17.61 ± 1.30 | 1.66 ± 0.05 | 3.21 ± 0.40 |
| 1.8        | 17.08 ± 1.30 | 1.72 ± 0.19 | 3.27 ± 0.49 |
| 1.9        | 16.35 ± 1.56 | 1.72 ± 0.07 | 3.33 ± 0.47 |
| 2.1        | 16.02 ± 1.48 | 1.78 ± 0.11 | 3.37 ± 0.46 |
| 2.3        | 15.42 ± 1.59 | 1.75 ± 0.06 | 3.50 ± 0.48 |
| 2.4        | 15.29 ± 1.59 | 1.87 ± 0.02 | 3.49 ± 0.40 |
| 2.6        | 14.90 ± 1.76 | 1.87 ± 0.17 | 3.59 ± 0.41 |
| 2.8        | 14.51 ± 1.69 | 1.77 ± 0.06 | 3.60 ± 0.28 |
| 2.9        | 14.20 ± 1.85 | 1.87 ± 0.20 | 3.71 ± 0.32 |
| 3.1        | 13.82 ± 1.71 | 1.81 ± 0.14 | 3.75 ± 0.35 |
| 3.3        | 13.65 ± 1.88 | 1.89 ± 0.07 | 3.77 ± 0.32 |
| 3.4        | 13.30 ± 1.79 | 1.93 ± 0.09 | 3.88 ± 0.33 |
| 3.6        | 13.00 ± 1.75 | 1.95 ± 0.12 | 3.82 ± 0.31 |
| 3.8        | 12.70 ± 1.69 | 1.88 ± 0.18 | 3.81 ± 0.25 |
| 3.9        | 12.53 ± 1.81 | 2.06 ± 0.22 | 3.86 ± 0.29 |
| 5.0        | 11.13 ± 1.74 | 1.90 ± 0.09 | 4.00 ± 0.20 |
| 7.0        | 9.43 ± 1.74  | 1.87 ± 0.05 | 4.12 ± 0.17 |
| 9.0        | 8.21 ± 1.75  | 1.80 ± 0.09 | 4.18 ± 0.26 |
| 11.0       | 7.32 ± 1.76  | 1.77 ± 0.16 | 4.23 ± 0.30 |
| 13.0       | 6.61 ± 1.76  | 1.72 ± 0.14 | 4.20 ± 0.29 |
| 15.0       | 6.01 ± 1.66  | 1.68 ± 0.11 | 4.22 ± 0.31 |
| 17.0       | 5.59 ± 1.57  | 1.63 ± 0.08 | 4.16 ± 0.33 |
| 19.0       | 5.25 ± 1.51  | 1.59 ± 0.14 | 4.15 ± 0.35 |
| 22.5       | 4.75 ± 1.32  | 1.52 ± 0.13 | 4.08 ± 0.37 |
| 27.5       | 4.22 ± 1.08  | 1.42 ± 0.09 | 4.02 ± 0.39 |
| 32.5       | 3.82 ± 0.92  | 1.33 ± 0.11 | 3.94 ± 0.36 |
| 37.5       | 3.52 ± 0.80  | 1.26 ± 0.08 | 3.87 ± 0.39 |
| 42.5       | 3.24 ± 0.69  | 1.21 ± 0.07 | 3.79 ± 0.36 |
| 47.5       | 3.01 ± 0.62  | 1.15 ± 0.08 | 3.72 ± 0.40 |
| 52.5       | 2.81 ± 0.54  | 1.10 ± 0.06 | 3.68 ± 0.38 |
| 57.5       | 2.64 ± 0.47  | 1.05 ± 0.07 | 3.62 ± 0.40 |
| 65.0       | 2.43 ± 0.39  | 1.00 ± 0.06 | 3.54 ± 0.36 |
| 75.0       | 2.17 ± 0.30  | 0.92 ± 0.05 | 3.45 ± 0.38 |
| 85.0       | 1.94 ± 0.24  | 0.86 ± 0.03 | 3.35 ± 0.36 |

**Table S20:** Kinetic data for  $^{68}\text{Ga-Y6}$  ( $^{68}\text{Ga-Trivehexin}$ ), derived from ROI analysis of 90 min dyn. PET scans (n = 3).

| Time (min) | Blood         | Muscle      | Tumor       |
|------------|---------------|-------------|-------------|
| 0.0        | 0.00 ± 0.00   | 0.00 ± 0.00 | 0.00 ± 0.00 |
| 0.1        | 3.40 ± 2.13   | 0.00 ± 0.00 | 0.16 ± 0.24 |
| 0.2        | 7.35 ± 4.77   | 0.26 ± 0.45 | 0.51 ± 0.60 |
| 0.3        | 11.96 ± 7.68  | 0.69 ± 1.20 | 0.87 ± 0.92 |
| 0.4        | 17.23 ± 11.03 | 0.61 ± 1.05 | 1.45 ± 1.19 |
| 0.5        | 19.30 ± 10.77 | 1.00 ± 1.72 | 1.80 ± 1.18 |
| 0.6        | 20.51 ± 10.61 | 1.15 ± 1.26 | 1.99 ± 1.07 |
| 0.8        | 19.30 ± 4.45  | 1.19 ± 1.01 | 2.45 ± 1.03 |
| 0.9        | 20.40 ± 2.40  | 1.52 ± 1.24 | 2.85 ± 0.83 |
| 1.1        | 18.82 ± 2.36  | 1.59 ± 1.15 | 2.98 ± 0.91 |
| 1.3        | 17.62 ± 2.21  | 1.83 ± 1.09 | 3.26 ± 0.82 |
| 1.4        | 16.65 ± 2.12  | 1.82 ± 0.98 | 3.37 ± 0.77 |
| 1.6        | 16.00 ± 2.12  | 2.07 ± 1.35 | 3.50 ± 0.78 |
| 1.8        | 15.43 ± 2.26  | 1.90 ± 1.41 | 3.70 ± 0.75 |
| 1.9        | 14.84 ± 2.05  | 2.01 ± 1.15 | 3.68 ± 0.80 |
| 2.1        | 14.30 ± 2.01  | 1.92 ± 1.14 | 3.99 ± 0.80 |
| 2.3        | 13.77 ± 1.90  | 1.95 ± 0.94 | 4.06 ± 0.85 |
| 2.4        | 13.40 ± 2.08  | 1.90 ± 1.06 | 4.16 ± 0.85 |
| 2.6        | 13.14 ± 1.99  | 1.93 ± 0.91 | 4.31 ± 0.80 |
| 2.8        | 12.75 ± 1.84  | 2.00 ± 1.00 | 4.40 ± 0.77 |
| 2.9        | 12.54 ± 1.97  | 2.34 ± 1.17 | 4.46 ± 0.66 |
| 3.1        | 12.04 ± 1.74  | 2.12 ± 1.26 | 4.48 ± 0.80 |
| 3.3        | 11.94 ± 1.93  | 2.17 ± 1.19 | 4.70 ± 0.83 |
| 3.4        | 11.44 ± 1.87  | 1.81 ± 0.97 | 4.75 ± 0.74 |
| 3.6        | 11.26 ± 1.76  | 2.33 ± 1.46 | 4.61 ± 0.80 |
| 3.8        | 10.99 ± 1.86  | 2.06 ± 1.24 | 4.80 ± 0.65 |
| 3.9        | 10.79 ± 1.86  | 2.30 ± 1.00 | 4.88 ± 0.72 |
| 5.0        | 9.54 ± 1.67   | 2.12 ± 1.06 | 5.14 ± 0.73 |
| 7.0        | 7.89 ± 1.29   | 2.16 ± 0.92 | 5.60 ± 0.62 |
| 9.0        | 6.86 ± 1.16   | 2.05 ± 0.79 | 5.87 ± 0.63 |
| 11.0       | 6.09 ± 1.01   | 2.02 ± 0.75 | 6.07 ± 0.61 |
| 13.0       | 5.56 ± 0.88   | 1.99 ± 0.62 | 6.20 ± 0.62 |
| 15.0       | 5.12 ± 0.85   | 1.94 ± 0.65 | 6.28 ± 0.68 |
| 17.0       | 4.78 ± 0.79   | 1.89 ± 0.63 | 6.37 ± 0.72 |
| 19.0       | 4.49 ± 0.75   | 1.81 ± 0.51 | 6.38 ± 0.75 |
| 22.5       | 4.10 ± 0.69   | 1.77 ± 0.51 | 6.47 ± 0.80 |
| 27.5       | 3.66 ± 0.64   | 1.66 ± 0.43 | 6.49 ± 0.84 |
| 32.5       | 3.32 ± 0.59   | 1.57 ± 0.39 | 6.50 ± 0.92 |
| 37.5       | 3.06 ± 0.53   | 1.50 ± 0.35 | 6.46 ± 0.97 |
| 42.5       | 2.85 ± 0.52   | 1.46 ± 0.31 | 6.41 ± 0.99 |
| 47.5       | 2.67 ± 0.50   | 1.40 ± 0.31 | 6.34 ± 1.02 |
| 52.5       | 2.53 ± 0.49   | 1.34 ± 0.32 | 6.31 ± 1.07 |
| 57.5       | 2.40 ± 0.48   | 1.34 ± 0.29 | 6.24 ± 1.11 |
| 65.0       | 2.26 ± 0.49   | 1.26 ± 0.28 | 6.17 ± 1.13 |
| 75.0       | 2.11 ± 0.50   | 1.20 ± 0.26 | 6.05 ± 1.17 |
| 85.0       | 1.99 ± 0.54   | 1.14 ± 0.24 | 5.93 ± 1.21 |
